# Supplementary material for: Risk factors for knee osteoarthritis after traumatic knee injury: a systematic review and meta-analysis of randomised controlled trials and cohort studies for the OPTIKNEE Consensus
Source: HighWire-hosted journal article supplement (doi:10.1136/bjsports-2022-105496), 2022-09-02
Supplement: bjsports-2022-105496supp001_data_supplement.pdf [file bjsports-2022-105496supp001_data_supplement.pdf]

## Whittaker et al., Risk factors for knee osteoarthritis after knee trauma

**Supplementary File: Extra Web Material**

|                                                                                  |         |
|----------------------------------------------------------------------------------|---------|
| 1. Database Search Strategies .....                                              | page 2  |
| 2. QUIPS Signaling Questions and Risk Definition Guidance .....                  | page 4  |
| 3. Semi-quantitative Synthesis Approach .....                                    | page 8  |
| 4. Study Characteristics .....                                                   | page 9  |
| 5. Summary of Symptomatic Osteoarthritis Estimates .....                         | page 13 |
| 6. Summary of Structural Osteoarthritis Estimates .....                          | page 17 |
| 7. Meta-analysis Forest Plots .....                                              | page 22 |
| • Male Sex .....                                                                 | page 22 |
| • Rehabilitation for Anterior Cruciate Ligament Tear .....                       | page 23 |
| • Anterior Cruciate Ligament Reconstruction for ACL Tear .....                   | page 24 |
| • Age at Anterior Cruciate Ligament Reconstruction .....                         | page 25 |
| • Body Mass Index at Anterior Cruciate Ligament Reconstruction .....             | page 26 |
| • Patellar Tendon Autograft at Anterior Cruciate Ligament Reconstruction .....   | page 27 |
| • Anterior Cruciate Ligament Reconstruction with Augmentation .....              | page 28 |
| • Cartilage Injury at Anterior Cruciate Ligament Reconstruction .....            | page 29 |
| • Anterior Cruciate Ligament Reconstruction with Partial Meniscectomy .....      | page 30 |
| • Anterior Cruciate Ligament Reconstruction with Total Medial Meniscectomy ..... | page 31 |

Whittaker et al., Risk factors for knee osteoarthritis after knee trauma

## 1. Database Search Strategies

### MEDLINE (OVID)

(exp Knee Injuries/ OR ((Knee/ OR Patella/ OR Patellofemoral Joint/ OR Knee Joint/) AND (Athletic Injuries/ OR Joint Dislocations/ OR Rupture/ OR "Wounds and Injuries"/ OR Reconstructive Surgical Procedures/)) OR (((knee\* OR patell\* OR tibiofemoral OR ACL OR PCL OR cruciate-ligament\* OR MCL OR LCL OR menisc\*) ADJ3 (injur\* OR tear\* OR sprain\* OR strain\* OR dislocat\* OR reconstruct\* OR surg\* OR repair\* OR sublux\* OR resect\* OR repair\* OR reconstruct\* OR shav\* OR lesion\* OR defect\* OR deficien\* OR wound\* OR damage\* OR torn OR trauma\* OR posttrauma\* OR surger\* OR reconstruct\*)) OR meniscectom\* OR patellectom\*).ab,ti.) AND (Osteoarthritis/ OR Osteoarthritis, Knee/ OR (osteoarthrit\* OR osteo-arthrit\* OR Arthrosis OR Arthroses OR Osteoarthros\* OR gonarthr\* OR ((degenerat\* OR arthrit\* OR oa) ADJ3 (knee\* OR joint\*))) .ab,ti.) AND (Systematic Review/ OR Meta-Analysis/ OR Randomized Controlled Trial/ OR exp Cohort Studies/ OR ((systematic\* ADJ3 review\*) OR meta-analy\* OR ((random\*) ADJ3 trial\*) OR cohort\* OR follow-up OR longitudinal\* OR prospectiv\* OR retrospectiv\*).ab,ti.) AND (Risk Factors/ OR Risk/ OR Causality/ OR Prognosis/ OR (risk OR risks OR causa\* OR prognos\* OR consequence\* OR history OR prior OR relationship\* OR predict\* OR subsequent\*).ab,ti.) AND english.la.

### EMBASE (OVID)

('knee injury'/exp OR 'knee surgery'/de OR 'knee ligament surgery'/exp OR 'meniscal surgery'/exp OR (('knee'/de OR 'patella'/de OR 'knee ligament'/exp OR 'patellofemoral joint'/de OR 'knee meniscus'/de) AND ('sport injury'/de OR 'joint dislocation'/de OR 'rupture'/de OR 'ligament rupture'/exp OR 'tendon rupture'/de OR 'injury'/de OR 'joint injury'/exp OR 'reconstructive surgery'/de)) OR (((knee\* OR patell\* OR tibiofemoral OR ACL OR PCL OR cruciate-ligament\* OR MCL OR LCL OR menisc\*) NEAR/3 (injur\* OR tear\* OR sprain\* OR strain\* OR dislocat\* OR reconstruct\* OR surg\* OR repair\* OR sublux\* OR resect\* OR repair\* OR reconstruct\* OR shav\* OR lesion\* OR defect\* OR deficien\* OR wound\* OR damage\* OR torn OR trauma\* OR posttrauma\* OR surger\* OR reconstruct\*)) OR meniscectom\* OR patellectom\*):ab,ti) AND ('osteoarthritis'/de OR 'knee osteoarthritis'/de OR 'knee arthritis'/de OR 'Knee Injury and Osteoarthritis Outcome Score'/de OR (osteoarthrit\* OR osteo-arthrit\* OR Arthrosis OR Arthroses OR Osteoarthros\* OR gonarthr\* OR ((degenerat\* OR arthrit\* OR oa) NEAR/3 (knee\* OR joint\*))) :ab,ti) AND ('systematic review'/de OR 'meta analysis'/de OR 'randomized controlled trial'/de OR 'cohort analysis'/de OR 'longitudinal study'/de OR 'prospective study'/de OR 'follow up'/de OR 'retrospective study'/de OR ((systematic\* NEAR/3 review\*) OR meta-analy\* OR ((random\*) NEAR/3 trial\*) OR cohort\* OR follow-up OR longitudinal\* OR prospectiv\* OR retrospectiv\*):ab,ti) AND ('risk factor'/de OR 'risk'/exp OR 'causality'/de OR 'prognosis'/de OR 'prognostic assessment'/de OR 'patient history of therapy'/de OR 'patient history of surgery'/de OR history/de OR 'medical history'/de OR prediction/de OR 'predictive value'/de OR (risk OR risks OR causa\* OR prognos\* OR consequence\* OR history OR prior OR relationship\* OR predict\* OR subsequent\*):ab,ti) NOT [conference abstract]/lim AND [English]/lim

### CINAHL (EBSCO)

(MH Knee Injuries+ OR ((MH Knee OR MH Patella OR MH Knee Joint ) AND (MH Athletic Injuries OR MH Dislocations OR MH Rupture OR MH "Wounds and Injuries" OR MH Surgery, Reconstructive)) OR TI((((knee\* OR patell\* OR tibiofemoral OR ACL OR PCL OR cruciate-ligament\* OR MCL OR LCL OR menisc\*) N2 (injur\* OR tear\* OR sprain\* OR strain\* OR dislocat\* OR reconstruct\* OR surg\* OR repair\* OR sublux\* OR resect\* OR repair\* OR reconstruct\* OR shav\* OR lesion\* OR defect\* OR deficien\* OR wound\* OR damage\* OR torn OR trauma\* OR posttrauma\* OR surger\* OR reconstruct\*)) OR meniscectom\* OR patellectom\*) OR AB((((knee\* OR patell\* OR tibiofemoral OR ACL OR PCL OR cruciate-ligament\* OR MCL OR LCL OR menisc\*) N2 (injur\* OR tear\* OR sprain\* OR strain\* OR dislocat\* OR reconstruct\* OR surg\* OR repair\* OR sublux\* OR resect\* OR repair\* OR reconstruct\* OR shav\* OR lesion\* OR defect\* OR deficien\* OR wound\* OR damage\* OR torn OR trauma\* OR posttrauma\* OR surger\* OR reconstruct\*)) OR meniscectom\* OR patellectom\*)) AND (MH Osteoarthritis OR MH Osteoarthritis, Knee OR TI(osteoarthrit\* OR osteo-arthrit\* OR Arthrosis OR Arthroses OR Osteoarthros\* OR gonarthr\* OR ((degenerat\* OR arthrit\* OR oa) N2 (knee\* OR joint\*))) OR AB(osteoarthrit\* OR osteo-arthrit\* OR

## Whittaker et al., Risk factors for knee osteoarthritis after knee trauma

Arthrosis OR Arthroses OR Osteoarthros\* OR gonarthr\* OR ((degenerat\* OR arthrit\* OR oa) N2 (knee\* OR joint\*))) AND (MH Systematic Review OR MH Meta-Analysis OR MH Randomized Controlled Trials OR MH Prospective Studies+ OR TI((systematic\* N2 review\*) OR meta-analy\* OR ((random\*) N2 trial\*) OR cohort\* OR follow-up OR longitudinal\* OR prospectiv\* OR retrospectiv\*) OR AB((systematic\* N2 review\*) OR meta-analy\* OR ((random\*) N2 trial\*) OR cohort\* OR follow-up OR longitudinal\* OR prospectiv\* OR retrospectiv\*)) AND (MH Risk Factors OR MH Causality OR MH Prognosis OR TI(risk OR risks OR causa\* OR prognos\* OR consequence\* OR history OR prior OR relationship\* OR predict\* OR subsequent\*) OR AB(risk OR risks OR causa\* OR prognos\* OR consequence\* OR history OR prior OR relationship\* OR predict\* OR subsequent\*)) AND LA(English)

**SPORTdiscus (EBSCO)**

(knee\* OR patell\* OR tibiofemoral OR ACL OR PCL OR cruciate-ligament\* OR MCL OR LCL OR menisc\*) n2 (injur\* OR tear\* OR sprain\* OR strain\* OR dislocat\* OR reconstruct\* OR surg\* OR repair\* OR sublux\* OR resect\* OR repair\* OR reconstruct\* OR shav\* OR lesion\* OR defect\* OR deficien\* OR wound\* OR damage\* OR torn OR trauma\* OR posttrauma\* OR surger\* OR reconstruct\*) OR meniscectom\* OR patellectom\*) AND osteoarthrit\* OR osteo-arthrit\* OR Arthrosis OR Arthroses OR Osteoarthros\* OR gonarthr\* OR (degenerat\* OR arthrit\* OR oa) n3 (knee\* OR joint\*) AND systematic review OR meta-analy\* OR (random\*) n2 (trial\*) OR cohort OR longitudinal study OR prospective study OR follow-up OR retrospective study

**Cochrane CENTRAL**

(((((knee\* OR patell\* OR tibiofemoral OR ACL OR PCL OR cruciate-ligament\* OR MCL OR LCL OR menisc\*) NEAR/3 (injur\* OR tear\* OR sprain\* OR strain\* OR dislocat\* OR reconstruct\* OR surg\* OR repair\* OR sublux\* OR resect\* OR repair\* OR reconstruct\* OR shav\* OR lesion\* OR defect\* OR deficien\* OR wound\* OR damage\* OR torn OR trauma\* OR posttrauma\* OR surger\* OR reconstruct\*)) OR meniscectom\* OR patellectom\*):ab,ti) AND ((osteoarthrit\* OR osteo-arthrit\* OR Arthrosis OR Arthroses OR Osteoarthros\* OR gonarthr\* OR ((degenerat\* OR arthrit\* OR oa) NEAR/3 (knee\* OR joint\*)))ab,ti) AND ((risk OR risks OR causa\* OR prognos\* OR consequence\* OR history OR prior OR relationship\* OR predict\* OR subsequent\*):ab,ti)

Whittaker et al., Risk factors for knee osteoarthritis after knee trauma

**2. Quality in Prognostic Studies (QUIPS) Risk of Bias Tool Signaling Questions and Risk Definition Guidance**

The Quality in Prognostic Studies (QUIPS) risk of bias tool requires research groups to establish definitions of risk level for each signaling question within each risk domain (e.g., selection bias) to match the context of their review.<sup>1</sup> Risk level definitions were operationalized based on QUIPS development,<sup>1</sup> and prognostic factor best practice recommendations.<sup>2</sup> Guidance pertaining to statistical analysis and regression model building, and results reporting, was sought from the STROBE (STrengthening the Reporting of OBservational studies in Epidemiology) checklist (statistical analysis and regression model building),<sup>3</sup> Prognosis Research Strategy (PROGRESS) 2,<sup>4</sup> and criteria for classifying and reporting osteoarthritis.<sup>5</sup> Finally, a comparable prognostic factor review assessing hip osteoarthritis,<sup>6</sup> a research report outlining the approach used to operationalize the QUIPS for a prognostic factor review of pain rehabilitation,<sup>7</sup> and foundational data imputation (i.e., missing data)<sup>8</sup> and epidemiologic principles were considered where applicable. Guidance within the context of post-traumatic knee osteoarthritis was provided from content matter experts within the authorship group (CBJ, SL). All team members approved the questions prior to study assessments.

| SIGNALING QUESTION                                      | DEFINITIONS                                                                                                                                                                                                                                                                                                  |
|---------------------------------------------------------|--------------------------------------------------------------------------------------------------------------------------------------------------------------------------------------------------------------------------------------------------------------------------------------------------------------|
| <b>Section 1: Biases Related to Study Participation</b> |                                                                                                                                                                                                                                                                                                              |
| Adequate participation in the study by eligible persons | Low = Number of enrolled participants and number of eligible participants assessed are reported.<br>Moderate = Number of eligible participants assessed are reported, but participation is low (<20%).<br>High = Number of eligible participants assessed not reported.                                      |
| Description of the source population                    | Low = Source population is reported in depth (e.g., pivoting athletes with ACL injuries, 10-20 years old).<br>Moderate = Source population is reported in general (e.g., persons with ACL injuries).<br>Low = When retrospective sufficient detail from the 'parent' study is reported (reference provided). |
| Description of the baseline study sample                | Low = At least age, sex, BMI, and injury type(s) are reported.<br><i>If any information is missing, downgrade based on context and amount of missing information.</i>                                                                                                                                        |
| Description of sampling frame and method of recruitment | Low = Clearly states who (e.g., persons with isolated ACL tear) was sampled and methods. Ideally methods minimize selection bias (e.g., consecutive cases, incident cases, randomized or probability-based sampling). When retrospective, selection criteria (i.e., one inclusion criteria) is reported.     |
| Description of period and place of recruitment          | Low = Clearly reports both recruitment period and site.<br>High = Does not report recruitment period or site.                                                                                                                                                                                                |
| Inclusion and exclusion criteria                        | Low = Explicitly reports at least 1 inclusion criteria.<br>High = No selection criteria information reported.                                                                                                                                                                                                |
| <b>Section 2: Biases Related to Study Attrition</b>     |                                                                                                                                                                                                                                                                                                              |
| Adequate response rate over study period                | Low = ≥80%.                                                                                                                                                                                                                                                                                                  |
| Attempts to collect information on dropouts             | Low = One attempt and method reported (i.e., letters, phone calls, number of attempts).<br>Moderate = No information on number of attempts or methods reported.                                                                                                                                              |
| Reasons for loss to follow-up                           | Low = Number of participants and reasons for loss to follow-up reported.<br>High = No reason(s) for participant loss to follow-up reported.                                                                                                                                                                  |

## Whittaker et al., Risk factors for knee osteoarthritis after knee trauma

|                                                                                     |                                                                                                                                                                                                                                                                                                                                                                                             |
|-------------------------------------------------------------------------------------|---------------------------------------------------------------------------------------------------------------------------------------------------------------------------------------------------------------------------------------------------------------------------------------------------------------------------------------------------------------------------------------------|
| Description of participants lost to follow-up                                       | Low = Demographic description (minimum age and sex) of participants lost to follow-up reported.<br>Moderate = Only age OR sex of participants lost to follow-up is reported.<br>High = No information about participants lost to follow-up is reported.                                                                                                                                     |
| Differences between participants who completed the study vs those lost to follow-up | Low = Analysis comparing (at a minimum the age and sex) those retained in the study vs those lost to follow-up is performed, and no differences exist.<br>High = Analysis comparing those retained in the study vs those lost to follow-up is not reported or clinically meaningful differences exist between the two groups.                                                               |
| <b>Section 3: Biases Related to Prognostic Factor Measurement</b>                   |                                                                                                                                                                                                                                                                                                                                                                                             |
| Clear, operationalized definition of the prognostic factor                          | Low = Clear description of how the prognostic factor was operationalized.                                                                                                                                                                                                                                                                                                                   |
| Methods of prognostic factor measurement                                            | Low = Methods used to measure the prognostic factor are clearly detailed including at a minimum the system and its measurement properties (relevant reference).<br>Moderate = The measurement properties of the measurement system are NOT reported.<br>High = Methods used to measure the prognostic factor are not reported.                                                              |
| Methods of prognostic factor measurement the same for all participants              | Low = Methods for measuring the prognostic factor(s) are the same for all participants, regardless of exposure status/demographics. Any deviations are noted and adequately justified.<br>Moderate = Deviations in methods to measure the prognostic factor(s) reported but NOT justified.<br>High = Methods for measuring the prognostic factor(s) differ based on exposure status.        |
| How were variables treated                                                          | Low = Continuous variables are treated as continuous, or logical and pre-specified categories based on referenced literature (i.e., for dichotomous/categorical variables there is a pre-specified cut-off).<br>Moderate = Information of how the prognostic variable was treated in NOT reported.<br>High = Cut-offs for dichotomous/categorical variables are based on data distribution. |
| Proportion of sample with complete data                                             | Low = Baseline prognostic factors are measured and reported for 100% of enrolled participants.<br>Moderate = Baseline prognostic factors are measured and reported for 90-99% of participants.<br>High = Baseline prognostic factors are measured and reported for <90% of enrolled participants.                                                                                           |
| How was missing prognostic factor data handled                                      | Low = Missing prognostic factor data is reported and handled through appropriate imputation methods when necessary. Complete case analysis based on <11% missing data.<br>Moderate = Complete case analysis performed with >10% missing data.<br>High = Missing prognostic factor data is not reported.                                                                                     |
| <b>Section 4: Biases Related to Outcome Measurement</b>                             |                                                                                                                                                                                                                                                                                                                                                                                             |
| A clear, operationalized definition of the outcome (osteoarthritis)                 | Low = A clear definition of osteoarthritis (e.g., radiographic, MRI, diagnostic code) is reported. If a grading scale is used it must be described (reference).<br>Moderate = A clear definition of osteoarthritis is NOT reported                                                                                                                                                          |

## Whittaker et al., Risk factors for knee osteoarthritis after knee trauma

|                                                                      |                                                                                                                                                                                                                                                                                                                                                                                                                                                                                                                      |
|----------------------------------------------------------------------|----------------------------------------------------------------------------------------------------------------------------------------------------------------------------------------------------------------------------------------------------------------------------------------------------------------------------------------------------------------------------------------------------------------------------------------------------------------------------------------------------------------------|
| Methods of outcome measurement                                       | Low = Methods used to measure OA are clearly reported, including who the assessor was (blinding to exposure status is expected), when (time points) OA was assessed, how OA was measured and the properties of the measurement system (i.e., reliability and validity).<br>Moderate = Methods reported but the measurement properties of the system are not provided OR multiple outcomes are used to assess OA without justification.<br>High = Methods not reported OR no justification for not blinding reported. |
| Methods of outcome measurement were the same for all participants    | Low = Methods used are the same for all participants, regardless of exposure status/demographics with any deviations noted and adequately justified.<br>Moderate = Outcome measurement deviations occurred but not justified.<br>High = Methods differed based on exposure status.                                                                                                                                                                                                                                   |
| <b>Section 5: Biases Related to Confounding</b>                      |                                                                                                                                                                                                                                                                                                                                                                                                                                                                                                                      |
| Definitions and conceptual justification of important confounders    | Low = Clear definition of potential confounder(s) with supporting evidence or conceptual rationale reported.<br>Moderate = No mention of potential confounders.                                                                                                                                                                                                                                                                                                                                                      |
| Important confounders are measured and reported                      | Low = A minimum four confounding variable (i.e., age, sex, injury type, BMI) are measured and reported (unless age, sex, injury type or BMI are the primary prognostic factor). If confounding was not assessed or addressed, justification related to the relationship between prognostic factor and outcome is reported.<br>High = No reporting of confounding, or justification of confounders considered.                                                                                                        |
| Methods of confounder measurement                                    | Low = Methods to measure confounders are clearly reported including measurement properties, AND the methods are the same for all participants, regardless of exposure status. Any deviations are reported and adequately justified.<br>Moderate = Deviations occurred and were NOT justified.<br>High = Methods differed based on exposure status.                                                                                                                                                                   |
| How was missing confounder data handled                              | Low = Missing data was reported and handled through appropriate imputation methods when necessary.<br>Moderate = Complete case analysis performed with >10% missing data.<br>High = No mention of missing confounder data.                                                                                                                                                                                                                                                                                           |
| Methods of confounder adjustment                                     | Low = Methods used to account for potential confounders are reported and include acceptable methods related to the study design (e.g., stratification, matching, randomization) or analysis (using stratification or adjustment).<br>Moderate = Adjustments were performed, but continuous confounding variable data was categorized without an appropriate, pre-specified cut off.<br>High = Known confounders were not adjusted for.                                                                               |
| <b>Section 6: Bias Related to Statistical Analysis and Reporting</b> |                                                                                                                                                                                                                                                                                                                                                                                                                                                                                                                      |
| Data presentation and adequacy of analytic strategies                | Low = Analytic strategy for the prognostic variable and outcome relationship is clearly stated, with statistical estimate and confidence intervals reported.<br>Moderate = Analytic strategy is not clear, or not appropriate based on                                                                                                                                                                                                                                                                               |

## Whittaker et al., Risk factors for knee osteoarthritis after knee trauma

|                                                        |                                                                                                                                                                                                                                                                                                                                              |
|--------------------------------------------------------|----------------------------------------------------------------------------------------------------------------------------------------------------------------------------------------------------------------------------------------------------------------------------------------------------------------------------------------------|
|                                                        | the hypothesis, OR no confidence intervals for the estimate are reported (when applicable).<br>High = Analytic strategy is not reported in sufficient detail to enable replication.                                                                                                                                                          |
| Regression model building approach                     | Low = When regression was used, a clear description of the methods used to build the model (e.g., stepwise, adding in pre-specified confounders) was reported.<br>Moderate = No description of the model building strategy is reported.<br>High = Incorrect model was used based on outcome variable (i.e., linear for categorical outcome). |
| The selected regression model matches the study design | Low = The model selected matches the study hypothesis/aim, OR is performed according to a pre-published protocol.                                                                                                                                                                                                                            |
| Selective reporting                                    | Low = All results related to prognostic factors and OA outcome are reported in text or in clearly interpretable figures/tables. All statistical models (or analyses) report an estimate, and error (SE, SD, range or CI).<br>Moderate = Results for non-significant findings are not reported.                                               |

BMI (body mass index), OA (osteoarthritis), SD (standard deviation), SE (Standard Error), CI (confidence interval), MRI (magnetic resonance imaging)

## References

- Hayden JA, van der Windt DA, Cartwright JL, et al. Assessing bias in studies of prognostic factors. *Ann Intern Med* 2013;158(4):280-6. doi: 10.7326/0003-4819-158-4-201302190-00009 [published Online First: 2013/02/20]
- Riley RD, Moons KGM, Snell KIE, et al. A guide to systematic review and meta-analysis of prognostic factor studies. *BMJ* 2019;364:k4597. doi: 10.1136/bmj.k4597 [published Online First: 2019/02/01]
- von Elm E, Altman DG, Egger M, et al. The Strengthening the Reporting of Observational Studies in Epidemiology (STROBE) Statement: guidelines for reporting observational studies. *Int J Surg* 2014;12(12):1495-9. doi: 10.1016/j.ijsu.2014.07.013
- Riley RD, Hayden JA, Steyerberg EW, et al. Prognosis Research Strategy (PROGRESS) 2: prognostic factor research. *PLoS Med* 2013;10(2):e1001380. doi: 10.1371/journal.pmed.1001380 [published Online First: 2013/02/09]
- Altman R, Asch E, Bloch D, et al. Development of criteria for the classification and reporting of osteoarthritis. Classification of osteoarthritis of the knee. Diagnostic and Therapeutic Criteria Committee of the American Rheumatism Association. *Arthritis Rheum* 1986;29(8):1039-49. doi: 10.1002/art.1780290816 [published Online First: 1986/08/01]
- Teirlinck CH, Dorleijn DMJ, Bos PK, et al. Prognostic factors for progression of osteoarthritis of the hip: a systematic review. *Arthritis Res Care* 2019;21(1):192. doi: 10.1186/s13075-019-1969-9 [published Online First: 2019/08/25]
- Grooten WJA, Tseli E, Ang BO, et al. Elaborating on the assessment of the risk of bias in prognostic studies in pain rehabilitation using QUIPS-aspects of interrater agreement. *Diagn Progn Res* 2019;3:5. doi: 10.1186/s41512-019-0050-0 [published Online First: 2019/05/17]
- Sterne JA, White IR, Carlin JB, et al. Multiple imputation for missing data in epidemiological and clinical research: potential and pitfalls. *BMJ* 2009;338:b2393. doi: 10.1136/bmj.b2393 [published Online First: 2009/07/01]



### 3: Semi-quantitative Synthesis Approach

Semi-quantitative syntheses<sup>1</sup> involved rating the quality and confidence of evidence for potential risk factors using a similar modified GRADE approach with adaptations to assess non-pooled data across all six domains. Specifically;

1. Phase of investigation (study design)<sup>2</sup> was rated as low-quality (Phase 1 exploratory design aimed at identifying associations), or high-quality (Phase 2 explanatory design testing an independent prognostic factor and outcome association, or Phase 3 explanatory design aimed at understanding or explaining a prognostic pathway).<sup>2</sup> Risk factors assessed with both Phase 2 and 3 studies were rated high-quality, while factors with Phase 1, 2 and 3 or Phase 1 and 2 were rated moderate-quality.
2. Methodological weakness (risk of bias) was rated based on QUIPS assessments as 'no serious limitations' (mostly low and no or minimal moderate ratings), 'serious limitations' (moderate and high ratings in  $\geq 1$  domain), and 'very serious limitations' (mostly moderate or high ratings). Consideration was given (no downgrading) when there were  $\geq 2$  Phase 3 or 2 studies for a given risk factor with no serious limitations regardless of Phase 1 studies with serious or very serious limitations.
3. Inconsistency was rated as present when estimates varied in direction, with minimal 95%CI overlap or, absent when estimates were similar in direction with 95%CI overlap.
4. Indirectness was considered in relation to this review's objective, risk factor definition, risk factor comparison, and sample characteristics. If a risk factor was only assessed in one knee injury type, it was considered indirect given the aim to broadly identify risk factors for OA after knee trauma.
5. Imprecision was rated as present if the sample size calculation for a risk factor and OA outcome relationship was not presented, or wide 95%CIs indicated important opposite directions of potential effect.<sup>1</sup> Imprecision was rated as absent if there was an adequate sample size and narrow 95%CIs.
6. Publication bias was rated present when a relationship between a risk factor and OA outcome was reported, and either 1) the estimate and p-value were not reported due to a lack of statistical significance<sup>3</sup> or, 2) a moderate to large effect was reported based on a reasonably small ( $n \leq 100$ ) sample size.<sup>4</sup>

The quality of evidence was upgraded for a consistent moderate ( $OR \geq 2$ ) or large ( $OR \geq 5$ ) effect,<sup>3</sup> or consistent evidence of an exposure-gradient response.<sup>3</sup> All domain ratings were considered when assigning an overall judgement of high, moderate, low, or very-low quality of evidence<sup>1</sup> and a corresponding statement of confidence in the direction (considering consistency reported across studies) and magnitude of the risk factor and OA relationship was generated.

### References

1. Huguet A, Hayden JA, Stinson J, et al. Judging the quality of evidence in reviews of prognostic factor research: adapting the GRADE framework. *Syst Rev* 2013;2(1):71. doi: 10.1186/2046-4053-2-71
2. Hayden JA, Cote P, Steenstra IA, et al. Identifying phases of investigation helps planning, appraising, and applying the results of explanatory prognosis studies. *J Clin Epidemiol* 2008;61(6):552-60. doi: 10.1016/j.jclinepi.2007.08.005 [published Online First: 2008/05/13]
3. Higgins JPT, Thomas J, Chandler J, et al. Cochrane Handbook for Systematic Reviews of Interventions. 2019. [www.training.cochrane.org/handbook](http://www.training.cochrane.org/handbook).
4. Nuesch E, Trelle S, Reichenbach S, et al. Small study effects in meta-analyses of osteoarthritis trials: meta-epidemiological study. *BMJ* 2010;341:c3515. doi: 10.1136/bmj.c3515 [published Online First: 2010/07/20]



## Whittaker et al., Risk factors for knee osteoarthritis after knee trauma

## 4. Study Characteristics

| Author, Year (Design, Phase) | Sample n (% female)          | Primary Injury | Treatment       | Injury to Baseline (months) <sup>1,2</sup>  | Injury Age (years) <sup>2,3</sup>                                       | Baseline BMI (kg/m <sup>2</sup> ) <sup>2</sup> | Prognostic Factor(s)                                                                                                                      | Follow-up (years) <sup>2</sup> | OA Outcome                                       | Joint   |
|------------------------------|------------------------------|----------------|-----------------|---------------------------------------------|-------------------------------------------------------------------------|------------------------------------------------|-------------------------------------------------------------------------------------------------------------------------------------------|--------------------------------|--------------------------------------------------|---------|
| Aga, 2018 (RCT, 2)           | 113 (24)                     | ACL+           | ACL Rc          | DB: 15.5±18.2<br>SB: 15.7±20.3              | DB: 27.4±6.3<br>SB: 27.1±5.5                                            | DB: 25.1±2.9<br>SB: 24.5±3.1                   | Graft bundle #                                                                                                                            | DB: 2.0±.1<br>SB: 2.1±.2       | Radiograph <sup>5</sup>                          | TF      |
| Ahlden, 2009 (RCT, 2)        | 44 (32)                      | ACL+           | ACL Rc          | ST: 17 (3-240)<br>BPTB: 11 (2-252)          | ST: 29 (15-40) <sup>14</sup><br>BPTB: 26 (14-48) <sup>14</sup>          | NR                                             | Graft source                                                                                                                              | 7.4 (5.8-9.2)                  | Radiograph <sup>6,7</sup>                        | TF, PFJ |
| Ahn, 2012 (RC, 1)            | 117 (25)                     | ACL+           | ACL Rc          | 42.7 (-5-360)                               | 29.2 (17-51)                                                            | 24.2±3.3                                       | Age at Sx<br>BMI at Sx<br>Injury to Sx (time)<br>Meniscal Tx<br>Joint morphology                                                          | 10.3 (8-13.1)                  | Radiograph <sup>8</sup>                          | TF, PFJ |
| Akelman, 2017 (RCT, 2)       | T1: 85 (56)<br>T2: 72 (NR)   | ACL            | ACL Rc          | <12                                         | High Tension: 23<br>Low Tension: 24                                     | NR                                             | Graft tension                                                                                                                             | T1: 5<br>T2: 6.7               | Radiograph, <sup>9</sup> MRI, <sup>11</sup> KOOS | TF, PFJ |
| Barenius, 2014 (RCT, 2)      | 134 (41)                     | ACL+           | ACL Rc          | BPTB: 13.9±23<br>ST: 16.3±23                | 40.0±6.4 <sup>15</sup>                                                  | NR                                             | Sex<br>Age at injury<br>BMI at Sx<br>Occupation<br>Meniscal Tx<br>Graft source<br>TF joint laxity                                         | 14.1±.5                        | Radiograph <sup>5</sup>                          | TF, PFJ |
| Bjornsson, 2016 (RCT, 2)     | 147 (35)                     | ACL+           | ACL Rc          | PT: 11.5 (2-252)<br>HT: 14.0 (2-360)        | PT: 26 (14- 52) <sup>14</sup><br>HT: 26 (15-59) <sup>14</sup>           | NR                                             | Graft source                                                                                                                              | PT: 16.9±.9<br>ST: 16.0±1.3    | Radiograph <sup>5,6,7</sup>                      | TF, PFJ |
| Cantin, 2016 (RC, 1)         | 589 (41)                     | ACL+           | ACL Rc          | 22±41                                       | 29.7±9                                                                  | 23.9±3.3                                       | Age at Sx<br>Cartilage injury<br>Meniscus Tx<br>TF joint laxity                                                                           | 11.9±.8                        | Radiograph <sup>8</sup>                          | TF, PFJ |
| Castoldi, 2020 (RCT, 2)      | 45 (26)                      | ACL+           | ACL Rc          | NR                                          | 26 (15-40)                                                              | NR                                             | Graft augmentation                                                                                                                        | 19.4 (19-20.2)                 | Radiograph <sup>6,10</sup>                       | TF, PFJ |
| Culvenor 2017 (RC, 2)        | T1: 181 (42)<br>T2: 142 (NR) | ACL+           | ACL Rc          | NR                                          | 27 ± 8                                                                  | 26.5±3.7                                       | Post-ACL Rc pain                                                                                                                          | T1: ~15<br>T2: ~20             | Radiograph, <sup>5</sup> pain                    | PFJ     |
| Curado, 2019 (RC, 1)         | 182 (63)                     | ACL+           | ACL Rc          | ~16                                         | 26 ± 7                                                                  | 23.4±2.6                                       | Age at Sx<br>Return to sport<br>Meniscus Tx<br>TF joint laxity<br>Post-ACL Rc Sx                                                          | 22±1                           | Radiograph <sup>8</sup>                          | TF, PFJ |
| Drogset, 2006 (RCT, 2)       | 103 (NR)                     | ACL+           | ACL Rc, ACLRp   | NR                                          | 29 (16-50)                                                              | NR                                             | Graft augmentation                                                                                                                        | ~16                            | Radiograph <sup>6</sup>                          | TF      |
| Drogset, 2002 (RCT, 2)       | 68 (55)                      | ACL+           | ACL Rc          | 42 (1-180)                                  | 26 (16-48) <sup>14</sup>                                                | NR                                             | Concomitant injury<br>Graft augmentation                                                                                                  | ~8                             | Radiograph <sup>6</sup>                          | TF      |
| Elveos, 2018 (RCT, 2)        | 56 (55)                      | ACL+           | ACL Rc          | BPTB: 40 (1-180)<br>LAD: 46 (3-168)         | BPTB: 25 (16-42)<br>LAD: 27 (17-48)                                     | NR                                             | Graft augmentation                                                                                                                        | 25 (24-26)                     | Radiograph <sup>6</sup>                          | TF      |
| Filbay, 2021 (PC, 1)         | 251 (NR)                     | ACL+           | ACL Rc, ACLNoSx | 5±4 <sup>13</sup>                           | 23 (19-28) <sup>4</sup>                                                 | 27 (24, 29) <sup>15</sup>                      | Sex<br>Meniscal Tx<br>ACL Tx at 4yr<br>4yr knee function<br>4yr joint ROM<br>4yr TF joint laxity<br>4yr activity level<br>4yr SR function | 32-37                          | Radiograph <sup>5</sup> , KOOS                   | TF, PFJ |
| Frobell, 2013 (RCT, 2)       | 113 (27)                     | ACL+           | ACL Rc, ACLNoSx | <1                                          | Early: 26.4±5.1<br>Delay: 25.8±4.7                                      | Early: 24.5±3.1<br>Delay: 23.8±2.6             | Tx approach                                                                                                                               | ~5                             | Radiograph <sup>9</sup>                          | TF, PFJ |
| Gifstad, 2013 (RC, 1)        | 108 (56)                     | ACL+           | ACL Rc          | Revision: 14 (0-178)<br>Primary: 14 (2-180) | Revision: 34 (20-57) <sup>15</sup><br>Primary: 36 (20-57) <sup>15</sup> | NR                                             | ACL Rc revision                                                                                                                           | 7.5 (2.8-13.2)                 | Radiograph <sup>5</sup>                          | TF      |
| Gudas, 2012 (RCT, 2)         | 57 (37)                      | Cartilage      | OAT, MF         | NR                                          | OCD: 24.6±6.5 <sup>14</sup><br>ACD: 24.3±6.8 <sup>14</sup>              | NR                                             | Cartilage Sx                                                                                                                              | 10.4 (9-11)                    | Radiograph <sup>5</sup>                          | TF      |

## Whittaker et al., Risk factors for knee osteoarthritis after knee trauma

|                                |                                                             |                  |                       |                                                                    |                                                               |                                                                                |                                                                                                       |                                        |                                           |         |
|--------------------------------|-------------------------------------------------------------|------------------|-----------------------|--------------------------------------------------------------------|---------------------------------------------------------------|--------------------------------------------------------------------------------|-------------------------------------------------------------------------------------------------------|----------------------------------------|-------------------------------------------|---------|
| Haberfield, 2021 (PC, 1)       | 111 (36)                                                    | ACL+             | ACLR                  | Pivot: 3.1 (4.3) + 12<br>No Pivot: 4.0 (6.8) + 12                  | Pivot: 22 (7) <sup>14</sup><br>No Pivot: 31(14) <sup>14</sup> | Pivot: 26.1 ± 3.7<br>No Pivot: 25.9 ± 3.8                                      | Return to pivot sport                                                                                 | ~5                                     | Radiographs <sup>9</sup>                  | TF, PFJ |
| Hagmeijer, 2019 (RC, 1)        | 196 (36)                                                    | ACL+<br>meniscus | ACLRc, ACLNoSx        | NR                                                                 | 28.9±9.6                                                      | NR                                                                             | Age at injury<br>Tx approach<br>ACLRc timing<br>Meniscus Sx<br>Graft source                           | 17.5 (3.9-26.3)                        | Radiograph <sup>5</sup> , Diagnostic Code | TF      |
| Holm, 2010 (RCT, 2)            | 57 (42)                                                     | ACL?             | ACLRc                 | HT: 40.5± 41.6<br>PT: 41.3± 41.0                                   | HT: 27±9 <sup>14</sup><br>PT: 25±7 <sup>14</sup>              | HT: 25.2±2.8<br>PT: 26.5±3.5                                                   | ACLRc Sx technique                                                                                    | HT: 10.7±.4<br>PT: 10.2±.4             | Radiograph <sup>5</sup>                   | TF      |
| Holm, 2012 (RCT, 2)            | 53 (39)                                                     | ACL+             | ACLRc                 | Open: 46±74<br>Endo: 41± 62                                        | Open: 29.2±7.5<br>Endo: 27±9.4                                | Open: 26.6±3.6 <sup>15</sup><br>Endo: 27±3.5 <sup>15</sup>                     | ACLRc Sx technique                                                                                    | Open: 11.9±.5<br>Endo: 11.7±.5         | Radiograph <sup>5</sup>                   | TF      |
| Hoogeslag, 2019 (RCT, 2)       | 44 (23)                                                     | ACL+             | ACLRc, ACLRp          | ACLRp: 13 (12-16) <sup>13</sup><br>ACLRc: 47 (42-71) <sup>13</sup> | ACLRp: 21 (10-27)<br>ACLRc: 22 (19.3-25)                      | ACLRp: 23 (21-24.5) <sup>4</sup><br>ACLRc: 23 (22.1-24.4) <sup>4</sup>         | ACLRc Sx technique                                                                                    | ~2                                     | Radiograph <sup>5</sup>                   | TF      |
| Hamrin Senorski, 2019 (RCT, 1) | 124 (36)                                                    | ACL+             | ACLRc                 | 13 (2-360)                                                         | 27.9±8.3                                                      | NR                                                                             | Age at Sx<br>Injury to Sx (time)                                                                      | 16.4 (15.4-17.1)                       | Radiographs <sup>5</sup>                  | TF, PFJ |
| Janssen, 2013 (PC, 1)          | 86 (34)                                                     | ACL+             | ACLRc                 | 60±57.6                                                            | 31.2±8.0 <sup>14</sup>                                        | 24.5±3.1                                                                       | Age at Sx<br>Cartilage injury<br>Pre-Sx function<br>Sx history                                        | 10±.7                                  | Radiograph <sup>5,6</sup>                 | TF, PFJ |
| Johnson, 2016 (PC, 1)          | T1: 119 (48)<br>T2: 94 (NR)<br>T3: 114 (NR)<br>T4: 142 (NR) | ACL+             | ACLRc                 | NR                                                                 | Adolescent: 20.4±3.2<br>Adult: 29.2±2.5                       | NR                                                                             | Age at Sx                                                                                             | T1: ~2<br>T2: ~5<br>T3: ~10<br>T4: ~15 | Radiograph <sup>8</sup>                   | TF, PFJ |
| Jones, 2019 (RC, 2)            | 421 (51)                                                    | ACL+             | ACLRc                 | NR                                                                 | 19.8±4.9                                                      | 24.0±4.9                                                                       | Sex<br>Age at Sx<br>BMI at Sx<br>Pre-injury activity<br>Cartilage injury<br>Meniscus Tx<br>Graft type | ~2                                     | Radiograph <sup>9</sup>                   | TF      |
| Jonsson, 2004 (RC, 1)          | 63 (34)                                                     | ACL+             | ACLRc                 | 3.6 (0.5–15)                                                       | 25 (15–40)                                                    | NR                                                                             | TF joint laxity                                                                                       | 6.6 (4.9–9.6)                          | Radiograph <sup>7</sup>                   | TF      |
| Karikis, 2016 (RCT, 2)         | 87 (32)                                                     | ACL+             | ACLRc                 | SB: 10 (3-240)<br>DB: 9 (2-240)                                    | SB: 25 (18-52)<br>DB: 29 (18-52)                              | SB: 25.5±3.6<br>DB: 24.9±2.5                                                   | Graft bundle #                                                                                        | ~5                                     | Radiograph <sup>5,6</sup>                 | TF, PFJ |
| Kessler, 2008 (RC, 2)          | 109 (38)                                                    | ACL              | ACLRc, ACLNoSx        | NR                                                                 | 30.7 (12.5-54)                                                | NR                                                                             | Age at Sx<br>BMI at Sx<br>Tx approach                                                                 | 11.1 (7.5-16.3)                        | Radiograph <sup>5</sup>                   | TF, PFJ |
| Kvist, 2020 (PC, 1)            | 153 (30)                                                    | ACL+             | ACLRc, ACLNoSx        | NR                                                                 | 24±6                                                          | 27±4 <sup>15</sup>                                                             | Tx approach                                                                                           | 32-37                                  | Radiograph <sup>5</sup> , pain, symptoms  | TF, PFJ |
| Leys, 2012 (PC, 1)             | 109 (47)                                                    | ACL+             | ACLRc                 | NR                                                                 | PT: 25 (15-42)<br>HT: 24 (13-52)                              | NR                                                                             | Graft source<br>Post-ACLRc Sx                                                                         | ~15                                    | Radiograph <sup>8</sup>                   | TF, PFJ |
| Li, 2011 (RC, 1)               | 249 (39)                                                    | ACL+             | ACLRc                 | 18.8 (.1-307.8)                                                    | 26.4±10.2                                                     | NR                                                                             | BMI at Sx<br>Length of follow-up<br>Cartilage injury<br>Meniscus Tx                                   | 7.86 (2.1-20.3)                        | Radiograph <sup>5</sup>                   | TF, PFJ |
| Lohmander, 2004 (RC, 2)        | 103 (100)                                                   | ACL+             | ACLRc, ACLNoSx        | ~144                                                               | 31 (26-40) <sup>15</sup>                                      | 23 (18-40) <sup>15,18</sup>                                                    | Tx approach<br>Meniscus Tx                                                                            | ~12                                    | Radiographs <sup>5</sup> , KOOS           | TF, PFJ |
| Mascarenhas, 2010 (RC, 1)      | 34 (37)                                                     | ACL+             | ACLRc                 | NR                                                                 | Auto: 27.9±8.1<br>Allo: 28.1±9.1                              | Auto: 25.7 ± 3.9<br>Allo: 27.7 ± 4.8                                           | Graft type                                                                                            | Auto: 9.1±2.7<br>Allo: 10.3±2.6        | Radiograph <sup>5</sup>                   | TF      |
| Meuffels, 2008 (RC, 1)         | 50 (76)                                                     | ACL+             | ACLRc, ACLNoSx        | NR                                                                 | Sx: 37.6±6.2 <sup>15</sup><br>noSx: 37.8±6.8 <sup>15</sup>    | Sx: 25.3 (22.2-30.9) <sup>4,15</sup><br>noSx: 24.9 (20.9-28.7) <sup>4,15</sup> | Tx approach                                                                                           | ~10                                    | Radiograph <sup>5</sup>                   | ?       |
| Meunier, 2007 (RCT, 1)         | 93 (33)                                                     | ACL+             | ACLRc, ACLNoSx, ACLRp | NR                                                                 | Op: 22 (14-30)<br>Non-op: 21 (14-30)                          | NR                                                                             | Tx approach<br>Meniscus Tx<br>Meniscus Sx (future)<br>Graft augmentation                              | 15±1                                   | Radiograph <sup>6,7</sup>                 | ?       |
| Neuman, 2017 (PC, 2)           | 69 (NR)                                                     | ACL+             | ACLRc, ACLNoSx        | 0-18 <sup>13</sup>                                                 | 26±8                                                          | 26.3±4.4                                                                       | Serum biomarkers                                                                                      | ~16                                    | Radiograph <sup>9</sup>                   | TF, PFJ |
| Neuman, 2008 (PC, 1)           | 79 (42)                                                     | ACL+             | ACLRc, ACLNoSx        | <5 <sup>13</sup>                                                   | 26 (15-43)                                                    | 23±3                                                                           | Meniscus injury<br>Tx approach                                                                        | 15.7±1.4                               | Radiograph <sup>9</sup>                   | TF, PFJ |

## Whittaker et al., Risk factors for knee osteoarthritis after knee trauma

|                          |                              |                         |                |                                           |                                                                          |                                                                   |                                                                                    |                                                       |                                      |         |
|--------------------------|------------------------------|-------------------------|----------------|-------------------------------------------|--------------------------------------------------------------------------|-------------------------------------------------------------------|------------------------------------------------------------------------------------|-------------------------------------------------------|--------------------------------------|---------|
| Nordenvall, 2014 (RC, 3) | 64614 (37)                   | ACL+                    | ACLRC, ACLnoSx | NR                                        | 29 (15-60)                                                               | NR                                                                | Meniscus Tx<br>Meniscus injury<br>Tx approach                                      | 9 (2-25)                                              | Diagnostic Code                      | TF      |
| Oiestad, 2018 (RC, 2)    | 210 (43)                     | ACL+                    | ACLRC          | Pivot: 5 (0-260)<br>No Pivot: 9 (0-278)   | Pivot: 24.6 (13-48)<br>No Pivot: 27.1 (13-61)                            | Pivot: 26.1±3.5 <sup>15</sup><br>No Pivot: 26.5±3.8 <sup>15</sup> | Sex<br>Injury to Sx (time)<br>Return to pivot sport<br>Post-Sx function            | ~15                                                   | Radiograph <sup>5</sup> , pain       | TF, PFJ |
| Oiestad, 2010a (PC, 1)   | 181 (42)                     | ACL+                    | ACLRC          | Isolated: 7.1±10.7<br>Combined: 42.4±63.0 | Isolated: 37.5 (8.2) <sup>15</sup><br>Combined: 40.7 (8.7) <sup>15</sup> | NR                                                                | Concomitant injury                                                                 | 12.4±1.2                                              | Radiograph <sup>5</sup> , pain       | TF      |
| Oiestad, 2010b (PC, 1)   | 164 (57)                     | ACL+                    | ACLRC          | 27.2 (53)                                 | 27.4 ± 8.5                                                               | NR                                                                | Sex<br>Age at Sx<br>Concomitant injury<br>Graft source<br>Post-Sx function         | 12.1±1.4                                              | Radiograph <sup>5</sup> , pain       | TF      |
| Persson, 2018 (RC, 3)    | 645967 (26 <sup>16</sup> )   | Meniscus+               | Meniscal Sx    | NR                                        | 30.5 ± 8.6 <sup>16</sup>                                                 | NR                                                                | Meniscus Sx                                                                        | 10 (0-18)                                             | Diagnostic Code                      | TF, PFJ |
| Pinczewski, 2007 (RC, 1) | 128 (47)                     | ACL+                    | ACLRC          | NR                                        | PT: 25 (15-42)<br>HT: 24 (13-52)                                         | NR                                                                | Graft source<br>TF joint laxity<br>Post-Sx joint ROM<br>Post-Sx function           | ~10                                                   | Radiographs <sup>8</sup>             | TF, PFJ |
| Pinczewski, 2002 (RC, 1) | T1: 142 (47)<br>T2: 105 (NR) | ACL+                    | ACLRC          | NR                                        | PT: 25 (15-42)<br>HT: 24 (13-52)                                         | NR                                                                | Graft source                                                                       | T1: ~2<br>T2: ~5                                      | Radiographs <sup>8</sup>             | TF, PFJ |
| Rhon, 2018 (RC, 2)       | 3605 (5)                     | Joint Injury            | NR             | NR                                        | OA Dx: 31.1±8.9 <sup>15</sup><br>No OA: 26±6.1 <sup>15</sup>             | NR                                                                | Injury type                                                                        | 8.5±3.3                                               | Diagnostic Code                      | TF      |
| Risberg, 2016 (PC, 1)    | 167 (43)                     | ACL+                    | ACLRC          | 26.4±51.6                                 | 45.2 ± 9.1**                                                             | 26.7±4.0 <sup>15</sup>                                            | Injury type                                                                        | 17.8±1.8                                              | Radiograph <sup>5</sup> , pain       | TF, PFJ |
| Rockborn, 2020 (RC, 1)   | 62 (16)                      | Meniscus                | Meniscal Sx    | 0-25.5                                    | ~25                                                                      | NR                                                                | Meniscus Sx                                                                        | 13.5 (11-19)                                          | Radiograph <sup>6,7</sup>            | TF      |
| Roe, 2005 (RC, 1)        | 104 (47)                     | ACL+                    | ACLRC          | NR                                        | PT: 25 (15-42)<br>HT: 24 (13-52)                                         | NR                                                                | Sex<br>Graft source<br>TF joint laxity<br>Post-Sx joint ROM                        | ~7                                                    | Radiographs <sup>8</sup>             | TF, PFJ |
| Sajovic, 2018 (RCT, 2)   | 48 (42)                      | ACL+                    | ACLRC          | HT: 27.5±43.5<br>PT: 22.1±28.8            | HT: 42.5±7.5 <sup>15</sup><br>PT: 45.5±8.7 <sup>15</sup>                 | HT: 24.5±3.1<br>PT: 24±3.5                                        | Graft source<br>Cartilage injury<br>Meniscus Tx                                    | ~17                                                   | Radiographs <sup>8</sup>             | TF, PFJ |
| Sajovic, 2011 (RCT, 2)   | 52 (42)                      | ACL+                    | ACLRC          | HT: 25 (1-84)<br>PT: 23 (1-60)            | HT: 36 (25-54) <sup>15</sup><br>PT: 38 (27-58) <sup>15</sup>             | NR                                                                | Graft source<br>Meniscus Tx                                                        | ~11                                                   | Radiographs <sup>8</sup>             | TF, PFJ |
| Sajovic, 2006 (RCT, 2)   | 54 (50)                      | ACL+                    | ACLRC          | HT: 25 (1-84)<br>PT: 23 (1-60)            | HT: 24 (14-42) <sup>15</sup><br>PT: 27 (16-46) <sup>15</sup>             | NR                                                                | Graft source                                                                       | ~5                                                    | Radiographs <sup>8</sup>             | TF, PFJ |
| Sanders, 2017 (RC, 2)    | 971 (54)                     | Patellar<br>Dislocation | Sx, no-Sx      | NR                                        | Injury: 21.4±9.9<br>Control: 21.0±9.9                                    | NR                                                                | Sex<br>Age at injury<br>Injury type<br>Patellar Sx<br>Joint morphology             | Injury: 12.3±6.5<br>Control: 12.0±6.8                 | Radiographs <sup>10</sup> , symptoms | PFJ     |
| Sanders, 2016 (RC, 1)    | 1928 (39)                    | ACL+                    | ACLRC, ACLnoSx | NR                                        | 28.1±9.9 <sup>17</sup>                                                   | NR                                                                | Sex<br>Age at Sx<br>Concomitant injury<br>Tx approach<br>Meniscus Tx<br>Graft type | 13.7±7.2                                              | Diagnostic Code, TKA                 | NR      |
| Shelbourne, 2017 (PC, 1) | 423 (32)                     | ACL+                    | ACLRC          | 16.8 (0-246)                              | 23.2±6.9                                                                 | NR                                                                | Age at Sx<br>Meniscus Tx<br>Post-Sx joint ROM                                      | 22.5 (20-33.1)                                        | Radiographs <sup>8</sup>             | TF, PFJ |
| Shelbourne, 2015 (PC, 1) | 391 (NR)                     | ACL+                    | ACLRC          | NR                                        | 21.5±7.7                                                                 | NR                                                                | Injury type                                                                        | 5.6 (2-15)                                            | Radiographs <sup>8</sup>             | TF, PFJ |
| Shelbourne, 2012 (PC, 2) | 780 (NR)                     | ACL+                    | ACLRC          | NR                                        | 25.4±9.2                                                                 | NR                                                                | Cartilage lesion<br>Meniscus Tx<br>Post-Sx joint ROM                               | 10.5 (5-21.2)                                         | Radiographs <sup>8</sup>             | TF, PFJ |
| Snoeker, 2020 (RC, 3)    | 148072 (54)                  | Joint Injury            | NR             | NR                                        | Injury: 29.4±2.9<br>Control: 30.2±3.0                                    | NR                                                                | Injury type                                                                        | Injury: 14.5 (12.1-16.9)<br>Control: 13.9 (11.7-16.8) | Diagnostic codes                     | TF      |
| Sporsheim, 2019 (RCT, 2) | 64 (44)                      | ACL+                    | ACLRC          | <10 <sup>13</sup>                         | 60 (45-84) <sup>15</sup>                                                 | NR                                                                | Graft augmentation                                                                 | 30 (29-31)                                            | Radiographs <sup>6</sup>             | TF      |

## Whittaker et al., Risk factors for knee osteoarthritis after knee trauma

|                         |          |              |                 |                                             |                                                                 |                                                             |                                                                |                                            |                          |         |
|-------------------------|----------|--------------|-----------------|---------------------------------------------|-----------------------------------------------------------------|-------------------------------------------------------------|----------------------------------------------------------------|--------------------------------------------|--------------------------|---------|
| Sun, 2015 (RCT, 2)      | 424 (29) | ACL?         | ACL Rc          | NR                                          | DB-AU: 27.5 (19-52)<br>DB-AL: 27.1 (19-50)<br>SB: 28.2 (19-52)  | DB-AU: 23.5<br>DB-AL: 24.8<br>SB: 24.2                      | Graft bundle #                                                 | 3 (.1-3.3)                                 | Radiographs <sup>8</sup> | TF      |
| Ulstein, 2017 (PC, 1)   | 41 (28)  | ACL+         | ACL Rc          | ACL+: 5.5±2.5<br>ACL: 5.5±2.6               | ACL+: 34.9±6.8 <sup>15</sup><br>ACL: 34.7±7.4 <sup>15</sup>     | ACL+: 25.1±2.7 <sup>15</sup><br>ACL: 25.5±3.9 <sup>15</sup> | Injury type                                                    | ACL+: 8.2 (6.4-9.8)<br>ACL: 8.4 (6.7-9.8)  | Radiographs <sup>5</sup> | TF      |
| von Porat, 2004 (RC, 1) | 122 (0)  | ACL+         | ACL Rc, ACLnoSx | NR                                          | 38 (30-56) <sup>15</sup>                                        | 26 (2.3)                                                    | Tx approach<br>Meniscus injury                                 | ~14                                        | Radiographs <sup>5</sup> | TF      |
| Webster, 2016 (RCT, 2)  | 38 (23)  | ACL+         | ACL Rc          | .75-12.0                                    | HS: 26.1±5.9<br>PT: 26.6±6.7                                    | NR                                                          | Graft source                                                   | HS: 15.2±.6<br>PT: 15.3±.4                 | Radiographs <sup>5</sup> | TF      |
| Wellsandt, 2018 (PC, 1) | 84 (38)  | ACL+         | ACL Rc, ACLnoSx | No OA: 1.9±1.7<br>OA: 2.5±1.3               | No OA: 28.8±11.3<br>OA: 28.3±11.5                               | No OA: 25.3±3.6<br>OA: 25.5±4.8                             | Second ACL tear<br>Tx approach<br>Post-rehab function          | ~5                                         | Radiographs <sup>5</sup> | TF      |
| Whittaker, 2018 (PC, 2) | 146 (63) | Joint Injury | Sx, non-Sx      | 44.4-120                                    | OA: 16 (14-18) <sup>15</sup><br>No OA: 15 (11-18) <sup>15</sup> | OA: 25.8 (21.3-38.9)<br>No OA: 24.2 (18.5-36)               | Injury type<br>Bilateral knee injury<br>ACL Rc<br>Bilateral Sx | OA: 6.8 (4-9.5)<br>No OA: 7.0 (3.7-10)     | MRI <sup>12</sup>        | TF, PFJ |
| Yoo, 2017 (RCT, 2)      | 132 (9)  | ACL+         | ACL Rc          | Auto: 1.3 (.1-108.3)<br>Allo: 1.7 (.1-50.1) | Auto: 30 (15-62)<br>Allo: 24 (13-52)                            | NR                                                          | ACL Rc graft type                                              | Auto: 2.7 (2.4-4.3)<br>Allo: 2.9 (2.1-5.0) | Radiographs <sup>5</sup> | TF      |

ACD (Articular cartilage defect), ACL (Anterior cruciate ligament tear, no concomitant injury), ACL+ (ACL tear+concomitant injury), ACL+? (ACL tear, concomitant injury unknown), ACL Rc (ACL tear reconstruction), ACL Rp (ACL tear repair), ACLnoSx (ACL tear no Sx), Allo (Allograft), Auto (Autograft), BMI (Body Mass Index), BPTB (Bone patellar tendon bone graft), DB (Double bundle ACL graft), DB-AU (Double Bundle autograft), DB-AL (Double Bundle allograft), Dx (Diagnosis), Endo (Endoscopic ACLR), HT (Hamstring tendon graft), KOOS (Knee Injury and Osteoarthritis Outcome Score), LAD (Kennedy Ligament Augmentation Device), Meniscus+ (meniscus injury+concomitant injury), MF (Microfracture), MRI (Magnetic Resonance Imaging), NR (Not reported), OA (Osteoarthritis), OAT (Osteochondral autologous transplantation), OCD (Osteochondral defect), PC (Prospective cohort study), PFJ (Patellofemoral joint), PT (Patellar tendon graft), RC (Retrospective cohort study), RCT (Randomized controlled trial), SB (Single bundle ACL graft), ST (Semitendinosus graft), Sx (Surgery), T (Follow-up time), TF (Tibiofemoral joint), TKA (Total knee arthroplasty), Tx (Treatment), US (United States), # (Number), ~ (Follow-up was broadly reported)

<sup>1</sup>If not available, time from injury to exposure was reported. <sup>2</sup>Mean±SD, median (min-max), or median (interquartile range). <sup>3</sup>If not available, age at Sx was reported. <sup>4</sup>Median (interquartile range). <sup>5</sup>Kellgren-Lawrence. <sup>6</sup>Ahlback. <sup>7</sup>Fairbanks. <sup>8</sup>IKDC. <sup>9</sup>OARSI Atlas (or modified OARSI Atlas). <sup>10</sup>Iwano. <sup>11</sup>Whole-Organ MRI Score. <sup>12</sup>MRI Osteoarthritis Knee Score. <sup>13</sup>Days. <sup>14</sup>at Sx. <sup>15</sup>at follow-up. <sup>16</sup>Only for exposed group, unexposed group not provided. <sup>17</sup>Only for knee injury group. <sup>18</sup>Mean (range).

## Whittaker et al., Risk factors for knee osteoarthritis after knee trauma

## 5. Summary of Symptomatic Osteoarthritis Estimates

| Author Year     | Primary Injury (Treatment)   | Method of OA Identification           | OA Definition                                                                                  | Persons with Clinical OA (n, %)  | Comparison(s)                                                      | Statistical Estimate Reported HR (95%CI)                                             | Re-calculated OR (95%CI) |
|-----------------|------------------------------|---------------------------------------|------------------------------------------------------------------------------------------------|----------------------------------|--------------------------------------------------------------------|--------------------------------------------------------------------------------------|--------------------------|
| Akelman, 2017   | ACL (ACLRc)                  | KOOS                                  | ≤ threshold on KOOS-QOL + ≥2 other subscale thresholds                                         | 13 (18%)                         | High vs low graft tension <sup>1</sup>                             | KOA NR (NS)                                                                          | KOA .56 (.19,1.92)       |
|                 |                              |                                       |                                                                                                |                                  | High graft tension vs controls <sup>1</sup>                        | KOA p=.09                                                                            | KOA 1.7 (.33,49.6)       |
|                 |                              |                                       |                                                                                                |                                  | Low graft tension vs controls <sup>1</sup>                         | KOA p=.01                                                                            | KOA 2.27 (.58,82.4)      |
| Culvenor, 2017  | ACL+ (ACLRc)                 | Radiograph (KL)<br>Self-reported pain | KL ≥2 + knee pain in last 4-wks                                                                | 15-yr 70 (39%)<br>20-yr 60 (42%) | AKP at 1-yr post-ACLRc (Y vs N <sup>1</sup> )                      | KOA 15-yr RR .87 (.50,1.59) <sup>2</sup><br>KOA 20-yr RR 1.1 (.57,1.98) <sup>2</sup> | -                        |
|                 |                              |                                       |                                                                                                |                                  | AKP at 2-yr post-ACLRc (Y vs N <sup>1</sup> )                      | KOA 15-yr RR 1.5 (.83,2.60) <sup>2</sup><br>KOA 20-yr RR .7 (.33,1.51) <sup>2</sup>  | -                        |
|                 |                              |                                       |                                                                                                |                                  | AKP at 1 or 2-yr post-ACLRc (Y vs N <sup>1</sup> )                 | KOA 15-yr RR 1.4 (.66,2.98)<br>KOA 20-yr RR 1.2 (.51,2.87)                           | -                        |
|                 |                              |                                       |                                                                                                |                                  | Male vs female <sup>2</sup> sex                                    | TF OA 2.1 (.8, 5.2)<br>PFJ OA 2.2 (.7, 6.6)                                          | -                        |
|                 |                              |                                       |                                                                                                |                                  | Early ACLRc <sup>2</sup> vs delayed ACLRc                          | TF OA 1.2 (.2, 6.1)<br>PFJOA .4 (.0, 3.7)                                            | -                        |
|                 |                              |                                       |                                                                                                |                                  | Early ACLRc <sup>2</sup> vs rehabilitation                         | TF OA 1.0 (.4, 2.4)<br><b>PFJ OA .2 (.1, .7)</b>                                     | -                        |
|                 |                              |                                       |                                                                                                |                                  | Meniscus tear (Y vs N <sup>2</sup> )                               | TF OA 1.5 (.6, 4.1)<br>PFJ OA 1.3 (.4, 4.5)                                          | -                        |
|                 |                              |                                       |                                                                                                |                                  | Meniscal surgery (Y vs no tear <sup>2</sup> )                      | TF OA 1.0 (.4, 2.6)<br>PFJ OA 1.0 (.3, 3.3)                                          | -                        |
|                 |                              |                                       |                                                                                                |                                  | Knee extension strength asymmetry at 4-yrs (Y vs N <sup>2</sup> )  | TF OA .6 (.2, 1.6)<br>PFJ OA .3 (.1, 1.3)                                            | -                        |
|                 |                              |                                       |                                                                                                |                                  | Knee flexion strength asymmetry at 4-yrs (Y vs N <sup>2</sup> )    | TF OA .6 (.2, 1.8)<br><b>PFJ OA 5.0 (1.3, 19.3)</b>                                  | -                        |
|                 |                              |                                       |                                                                                                |                                  | Hop distance asymmetry at 4-yrs (Y vs N <sup>2</sup> )             | TF OA 2.6 (.8, 8.4)<br><b>PFJ OA 4.9 (1.2, 19.7)</b>                                 | -                        |
|                 |                              |                                       |                                                                                                |                                  | Knee extension ROM loss at 4-yrs (Y vs N <sup>2</sup> )            | TF OA 1.4 (.4, 4.1)<br>PFJ OA 1.4 (.3, 5.8)                                          | -                        |
|                 |                              |                                       |                                                                                                |                                  | Knee flexion ROM loss at 4-yrs (Y vs N <sup>2</sup> )              | TF OA 1.8 (.7, 4.5)<br>PFJ OA .7 (.2, 2.3)                                           | -                        |
|                 |                              |                                       |                                                                                                |                                  | Anterior tibial translation at 4-yr >3 mm (Y vs N <sup>2</sup> )   | TF OA 1.2 (.5, 2.8)<br>PFJ OA .8 (.3, 2.6)                                           | -                        |
|                 |                              |                                       |                                                                                                |                                  | Tegner Score (0-5 vs. 6-10 <sup>2</sup> )                          | TF OA 1.2 (.5, 2.8)<br>PFJ OA 1.1 (.4, 3.4)                                          | -                        |
| Filbay , 2021   | ACL+ (ACLRp, ACLRc, ACLnoSx) | Radiograph (KL)<br>KOOS               | KL ≥2 +1-step decrease from best response on ≥50% of KOOS-pain or KOOS-symptoms subscale items | TF 61 (48%)<br>PFJ 31 (24%)      | Lysholm Score (0-83 vs. 84-100 <sup>2</sup> )                      | TF OA 1.5 (.6, 3.8)<br>PFJ OA 2.0 (.6, 6.6)                                          | -                        |
|                 |                              |                                       |                                                                                                |                                  | Age at injury <sup>2</sup>                                         | <b>KOA 1.1 (1.03,1.1)<sup>2</sup></b><br><b>TKA 1.1 (1.1,1.2)<sup>2</sup></b>        | -                        |
|                 |                              |                                       |                                                                                                |                                  | Meniscus Tx (meniscectomy vs untreated <sup>1</sup> ) <sup>2</sup> | KOA 1.3 (.7,2.2)<br>TKA 6.6 (.7,64.8)                                                | -                        |
|                 |                              |                                       |                                                                                                |                                  | Meniscus tear Tx (repair vs untreated <sup>1</sup> )               | KOA .47 (.1,2.4) <sup>2</sup><br>TKA UC                                              | -                        |
|                 |                              |                                       |                                                                                                |                                  | Acute ACLRc vs ACLnoSx <sup>1</sup>                                | KOA .97 (.5,1.8) <sup>2</sup><br>TKA .2 (.02,2.7) <sup>2</sup>                       | -                        |
|                 |                              |                                       |                                                                                                |                                  | Delayed ACLRc vs ACLnoSx <sup>1</sup>                              | KOA .7 (.4,1.2)<br>TKA .6 (.17,2.27)                                                 | -                        |
|                 |                              |                                       |                                                                                                |                                  | Allocated to ACLRc <sup>1</sup> vs ACLnoSx                         | NR                                                                                   | KOA 1.5 (.8,2.9)         |
|                 |                              |                                       |                                                                                                |                                  | ACLnoSx vs ACLRc <sup>1</sup>                                      | NR                                                                                   | KOA 1.2 (.7,2.4)         |
|                 |                              |                                       |                                                                                                |                                  | ACLnoSx <sup>1</sup> vs delayed ACLRc                              | NR                                                                                   | KOA 1.1 (.5,2.6)         |
|                 |                              |                                       |                                                                                                |                                  | Early <sup>1</sup> vs delayed ACLRc                                | NR                                                                                   | KOA 1.6 (.8,3.7)         |
| Kvist, 2020     | ACL+ (ACLRc, ACLnoSx)        | Radiograph (KL)<br>KOOS               | KL ≥2 +1-step decrease from best response on ≥50% of KOOS-pain or KOOS-symptoms subscale items | 76 (50%)                         | ACLRc vs ACLnoSx <sup>1</sup>                                      | KOA OR 1.7 (0.5,5.3) <sup>2</sup>                                                    | -                        |
|                 |                              |                                       |                                                                                                |                                  | Meniscus Sx vs no meniscus injury <sup>1</sup>                     | <b>KOA OR 4.8 (1.5,16)<sup>2</sup></b>                                               | -                        |
| Lohmander, 2004 | ACL+ (ACLRc, ACLnoSx)        | Radiograph (KL)<br>KOOS               | KL≥2 + ≤KOOS thresholds                                                                        | 28 (42%)                         |                                                                    |                                                                                      |                          |
|                 |                              |                                       |                                                                                                |                                  |                                                                    |                                                                                      |                          |

## Whittaker et al., Risk factors for knee osteoarthritis after knee trauma

|                  |                       |                                       |                                          |                             |                                                         |                                                                                                                                                                                        |                                                      |
|------------------|-----------------------|---------------------------------------|------------------------------------------|-----------------------------|---------------------------------------------------------|----------------------------------------------------------------------------------------------------------------------------------------------------------------------------------------|------------------------------------------------------|
| Nordenvall, 2014 | ACL+ (ACLRc, ACLnoSx) | Diagnostic Code                       | Diagnostic Code                          | 4314 (7%)                   | ACLRc vs ACLnoSx <sup>1</sup>                           | KOA Overall <b>1.3 (1.2,1.3)<sup>2</sup></b><br>KOA 2-5-yr 1.05 (0.95,1.2) <sup>2</sup><br>KOA 5-10-yr <b>1.3 (1.2,1.4)<sup>2</sup></b><br>KOA >10-yr <b>1.4 (1.3,1.6)<sup>2</sup></b> | -                                                    |
|                  |                       |                                       |                                          |                             | ACLRc + no meniscus injury vs ACLnoSx <sup>1</sup>      | KOA Overall <b>1.2 (1.1,1.3)<sup>2</sup></b><br>KOA 2-4.9-yr 1.04 (0.9,1.2) <sup>2</sup><br>KOA 5-9.9-yr 1.1 (0.9,1.3) <sup>2</sup><br>KOA >10-yr <b>1.4 (1.2,1.7)<sup>2</sup></b>     | -                                                    |
|                  |                       |                                       |                                          |                             | ACLRc + meniscus injury vs ACLnoSx <sup>1</sup>         | KOA Overall <b>1.2 (1.1,1.3)<sup>2</sup></b><br>KOA 2-5-yr 1.01 (0.85,1.2) <sup>2</sup><br>KOA 5-10-yr 1.1 (0.94,1.3) <sup>2</sup><br>KOA >10-yr <b>1.4 (1.2,1.6)<sup>2</sup></b>      | -                                                    |
|                  |                       |                                       |                                          |                             | ACLRc + meniscus injury (no Sx) vs ACLnoSx <sup>1</sup> | KOA Overall <b>1.3 (1.1,1.6)<sup>2</sup></b><br>KOA 2-5-yr 0.9 (0.7,1.3) <sup>2</sup><br>KOA 5-10-yr <b>1.6 (1.1,2.2)<sup>2</sup></b><br>KOA >10-yr <b>1.6 (1.2,2.2)<sup>2</sup></b>   | -                                                    |
|                  |                       |                                       |                                          |                             | ACLRc + meniscus Sx vs ACLnoSx <sup>1</sup>             | KOA Overall <b>1.2 (1.1,1.3)<sup>2</sup></b><br>KOA 2-5-yr 0.97 (0.8,1.1) <sup>2</sup><br>KOA 5-10-yr <b>1.2 (1.04,1.4)<sup>2</sup></b><br>KOA >10-yr <b>1.4 (1.2,1.7)<sup>2</sup></b> | -                                                    |
|                  |                       |                                       |                                          |                             | ACLRc (≤3-mo) vs ACLnoSx <sup>1</sup>                   | KOA Overall <b>1.2 (1.2,1.3)<sup>2</sup></b><br>KOA 2-5-yr 0.9 (0.8,1.0) <sup>2</sup><br>KOA 5-10-yr <b>1.3 (1.2,1.5)<sup>2</sup></b><br>KOA >10-yr <b>1.44 (1.3,1.6)<sup>2</sup></b>  | -                                                    |
|                  |                       |                                       |                                          |                             | ACLRc (3-12-mo) vs ACLnoSx <sup>1</sup>                 | KOA Overall <b>1.2 (1.1,1.4)<sup>2</sup></b><br>KOA 2-5-yr 1.2 (0.99,1.3) <sup>2</sup><br>KOA 5-10yr 1.2 (0.98,1.5) <sup>2</sup><br>KOA>10-yr <b>1.4 (1.02,1.9)<sup>2</sup></b>        | -                                                    |
|                  |                       |                                       |                                          |                             | ACLRc (>12-mo) vs ACLnoSx <sup>1</sup>                  | KOA Overall 1.1 (1.00,1.3) <sup>2</sup><br>KOA 2-5-yr 1.0 (0.9,1.2) <sup>2</sup><br>KOA 5-10-yr 1.1 (0.9,1.4) <sup>2</sup><br>KOA >10-yr 1.2 (0.9,1.6) <sup>2</sup>                    | -                                                    |
|                  |                       |                                       |                                          |                             | Male vs female sex <sup>1</sup>                         | KOA OR 1.2 (.4,3.7) <sup>2</sup>                                                                                                                                                       | -                                                    |
|                  |                       |                                       |                                          |                             | Age at surgery                                          | KOA OR 1.1 (.99,1.1) <sup>2</sup>                                                                                                                                                      | -                                                    |
| Oiestad, 2018    | ACL+ (ACLRc)          | Radiograph (KL)<br>Self-reported pain | KL≥2 + knee pain most days in last month | 31 (15%)                    | Time from injury to sx                                  | KOA OR .99 (.99,1.0)                                                                                                                                                                   | -                                                    |
|                  |                       |                                       |                                          |                             | Isolated <sup>2</sup> vs combined Injury                | <b>KOA OR 13.4 (1.7,107)<sup>2</sup></b>                                                                                                                                               | -                                                    |
|                  |                       |                                       |                                          |                             | Return, pivot sport (Y vs N1)                           | <b>KOA OR .3 (1.,9)<sup>2</sup></b>                                                                                                                                                    | -                                                    |
|                  |                       |                                       |                                          |                             | Cincinnati Knee Score 6-mo post-ACLRc <sup>3</sup>      | KOA OR 1.0 (.99,1.1) <sup>2</sup>                                                                                                                                                      | -                                                    |
|                  |                       |                                       |                                          |                             | Isolated vs combined Injury                             | KOA p=.053                                                                                                                                                                             | -                                                    |
| Oiestad, 2010a   | ACL+ (ACLRc)          | Radiograph (KL)<br>Self-reported pain | KL ≥2 + knee pain in last 4-wks          | 74 (41%)                    | Male vs female sex <sup>1</sup>                         | KOA OR 2.2 (1.0,4.2) <sup>2</sup>                                                                                                                                                      | -                                                    |
|                  |                       |                                       |                                          |                             | Additional injury (Y vs N <sup>1</sup> )                | KOA OR 1.5 (.7,3.3) <sup>2</sup>                                                                                                                                                       | -                                                    |
|                  |                       |                                       |                                          |                             | ST <sup>1</sup> vs PT autograft                         | KOA OR 2.4 (.7,8.3) <sup>2</sup>                                                                                                                                                       | -                                                    |
|                  |                       |                                       |                                          |                             | Cincinnati Knee Score 2-yr post-ACLRc                   | <b>KOA OR .95 (.92,.98)<sup>2</sup></b>                                                                                                                                                | -                                                    |
|                  |                       |                                       |                                          |                             | Quadriceps strength change 2-15-yr post-ACLRc           | KOA OR 1.0 (1.0,1.1) <sup>2</sup>                                                                                                                                                      | -                                                    |
| Persson, 2018    | Meniscus Injury (Sx)  | Diagnostic Code                       | Diagnostic Code                          | 15042 (2%)                  | Meniscus repair vs partial meniscectomy <sup>1</sup>    | KOA 0.7 (0.5,1.1) <sup>2</sup>                                                                                                                                                         | -                                                    |
|                  |                       |                                       |                                          |                             | Knee fracture vs mild knee injury <sup>2</sup>          | <b>KOA OR 1.4 (1.0,1.8)<sup>2</sup></b>                                                                                                                                                | -                                                    |
| Rhon, 2018       | Joint Injury (NR)     | Diagnostic Code                       | Diagnostic Code                          | 345 (10%)                   | Knee sprain vs mild knee injury <sup>1</sup>            | <b>KOA OR 1.6 (1.2,2.0)<sup>2</sup></b>                                                                                                                                                | -                                                    |
|                  |                       |                                       |                                          |                             | Soft tissue vs mild knee injury <sup>1</sup>            | <b>KOA OR 0.6 (0.4,0.8)<sup>2</sup></b>                                                                                                                                                | -                                                    |
|                  |                       |                                       |                                          |                             | Derangement vs mild knee injury <sup>1</sup>            | <b>KOA OR 2.4 (1.3,4.3)<sup>2</sup></b>                                                                                                                                                | -                                                    |
|                  |                       |                                       |                                          |                             | Dislocation vs mild knee injury <sup>1</sup>            | <b>KOA OR 3.7 (2.1,6.6)<sup>2</sup></b>                                                                                                                                                | -                                                    |
| Risberg, 2016    | ACL+ (ACLRc)          | Radiograph (KL)<br>Self-reported pain | KL≥2 + knee pain in last 4-wks           | TF 41 (25%)<br>PFJ 24 (14%) | Isolated <sup>1</sup> vs combined Injury                | TF OA p<0001<br>PFJ OA p=014                                                                                                                                                           | <b>TF OA 5.9 (1.6,15.9)</b><br>PFJ OA 4.7 (.91,16.5) |

## Whittaker et al., Risk factors for knee osteoarthritis after knee trauma

|               |                                  |                                                  |                                                                 |           |                                                         |                                                                                                                             |   |
|---------------|----------------------------------|--------------------------------------------------|-----------------------------------------------------------------|-----------|---------------------------------------------------------|-----------------------------------------------------------------------------------------------------------------------------|---|
| Sanders, 2017 | Patellar Dislocation (Sx, no-Sx) | Radiograph (Iwano) Self-reported pain            | Diagnostic Code + active PFJ pain in + PFJ radiographic changes | 66 (7%)   | Male vs female sex <sup>1</sup>                         | KOA OR 1.8 (1.1,4.3)                                                                                                        | - |
|               |                                  |                                                  |                                                                 |           | Age at injury (<18 vs >18 <sup>1</sup> )                | KOA OR 4.0 (1.7,10.4)                                                                                                       | - |
|               |                                  |                                                  |                                                                 |           | Patellar dislocation vs no injury <sup>1</sup>          | KOA OR 7.8 (3.9,17.6)                                                                                                       | - |
|               |                                  |                                                  |                                                                 |           | Number of dislocations (≥ 2 vs 1 <sup>1</sup> )         | KOA OR 4.5 (1.6,12.6)                                                                                                       | - |
|               |                                  |                                                  |                                                                 |           | Patellar stabilization Sx (Y vs N <sup>1</sup> )        | NR (NS)                                                                                                                     | - |
|               |                                  |                                                  |                                                                 |           | Cartilage defect (Y vs N <sup>1</sup> )                 | KOA OR 11.3 (5.0,26.6)                                                                                                      | - |
|               |                                  |                                                  |                                                                 |           | Patella Alta (Y vs N <sup>1</sup> )                     | NR (NS)                                                                                                                     | - |
|               |                                  |                                                  |                                                                 |           | Trochlear dysplasia (Y vs N <sup>1</sup> )              | KOA OR 3.6 (1.3,10.0)                                                                                                       | - |
| Sanders, 2016 | ACL+ (ACLRC, ACLnoSx)            | Radiologist diagnosis Self-reported OA diagnosis | Radiographic changes + Care seeking pain                        | NR        | Male vs female sex <sup>1</sup>                         | KOA 1.1 (.6,2.1)<br>TKA .1 (.06,5.7)                                                                                        | - |
|               |                                  |                                                  |                                                                 |           | Age at injury (≤20 <sup>1</sup> vs 21-40)               | KOA 3.1 (1.2,8.0)<br>TKA 2.1 (.04,116)                                                                                      | - |
|               |                                  |                                                  |                                                                 |           | Age at injury (≤20 <sup>1</sup> vs >40)                 | KOA 4.1 (1.2,14)<br>TKA 3.3 (.02,592)                                                                                       | - |
|               |                                  |                                                  |                                                                 |           | Early ACLRC vs no injury <sup>1</sup>                   | KOA OA 3.5 (1.9,6.6)<br>TKA .3 (.0,2.2)                                                                                     | - |
|               |                                  |                                                  |                                                                 |           | Delayed ACLRC vs no injury <sup>1</sup>                 | KOA OA 22.1 (13.3,36.8)<br>TKA 6.5 (3.1,13.7)                                                                               | - |
|               |                                  |                                                  |                                                                 |           | Delayed vs early ACLRC <sup>1</sup>                     | KOA 6.2 (3.4,11.4)<br>TKA 6.6 (.4,105.8)                                                                                    | - |
|               |                                  |                                                  |                                                                 |           | ACLRC <sup>1</sup> vs ACLnoSx                           | KOA 6.0 (4.3,8.4)<br>TKA 16.7 (5.0,55.2)                                                                                    | - |
|               |                                  |                                                  |                                                                 |           | Meniscus tear (Y vs N <sup>1</sup> )                    | KOA 1.7 (.84,3.47)<br>TKA 2.3 (.06,95)                                                                                      | - |
|               |                                  |                                                  |                                                                 |           | Medial and lateral meniscus tear (Y vs N <sup>1</sup> ) | KOA 4.3 (1.8,9.9)<br>TKA UC                                                                                                 | - |
|               |                                  |                                                  |                                                                 |           | Medial meniscus tear (Y vs N <sup>1</sup> )             | KOA 1.5 (.67,3.4)<br>TKA UC                                                                                                 | - |
|               |                                  |                                                  |                                                                 |           | Lateral meniscus tear (Y vs N <sup>1</sup> )            | KOA 1.0 (.34,2.6)<br>TKA UC                                                                                                 | - |
|               |                                  |                                                  |                                                                 |           | Meniscectomy (Y vs N <sup>1</sup> )                     | KOA 1.8 (.96,3.4)<br>TKA 3.9 (.09,161)                                                                                      | - |
|               |                                  |                                                  |                                                                 |           | Cartilage injury at surgery (Y vs N <sup>1</sup> )      | KOA 3.4 (1.4,8.0)<br>TKA 4.1 (.1,171)                                                                                       | - |
|               |                                  |                                                  |                                                                 |           | Autograft <sup>1</sup> vs Allograft                     | KOA 4.9 (2.1,11.7)<br>TKA 5.2 (.12,224)                                                                                     | - |
| Snoeker, 2020 | Joint Injury (NR)                | Diagnostic Code                                  | Diagnostic Code                                                 | 3276 (2%) | Cruciate ligament tear (Y vs N <sup>1</sup> )           | KOA 11-yr 8.2 (5.9,11.4) <sup>2</sup><br>KOA 12-19-yr 6.8 (5.0,9.2) <sup>2</sup><br>19-yr RD 19.6% (13.2,25.9) <sup>2</sup> | - |
|               |                                  |                                                  |                                                                 |           | Meniscus tear (Y vs N <sup>1</sup> )                    | KOA 11-yr 7.6 (5.5,10.5) <sup>2</sup><br>KOA 12-19-yr 4.0 (2.7,5.9) <sup>2</sup><br>19-yr RD 10.5% (6.4,14.7) <sup>2</sup>  | - |
|               |                                  |                                                  |                                                                 |           | Fracture (Y vs N <sup>1</sup> )                         | KOA 11-yr 7.0 (4.2,11.7) <sup>2</sup><br>KOA 12-19-yr 2.1 (0.9,5.1) <sup>2</sup><br>19-yr RD 6.6% (1.1,12.2) <sup>2</sup>   | - |
|               |                                  |                                                  |                                                                 |           | Dislocation (Y vs N <sup>1</sup> )                      | KOA 11-yr 5.9 (3.4,10.1) <sup>2</sup><br>KOA 12-19-yr 3.0 (1.4,6.3) <sup>2</sup><br>19-yr RD 6.7% (1.8,11.5) <sup>2</sup>   | - |
|               |                                  |                                                  |                                                                 |           | Collateral ligament tear (Y vs N <sup>1</sup> )         | KOA 11-yr 4.9 (3.3,7.3) <sup>2</sup><br>KOA 12-19-yr 2.1 (1.2,3.7) <sup>2</sup><br>19-yr RD 4.5% (1.3,7.8) <sup>2</sup>     | - |
|               |                                  |                                                  |                                                                 |           | Multiple structures injured (Y vs N <sup>1</sup> )      | KOA 11-yr 6.5 (5.0,8.5) <sup>2</sup><br>KOA 12-19-yr 3.2 (2.3,4.6) <sup>2</sup><br>19-yr RD 8.0% (5.4,10.7) <sup>2</sup>    | - |
|               |                                  |                                                  |                                                                 |           |                                                         |                                                                                                                             |   |
|               |                                  |                                                  |                                                                 |           |                                                         |                                                                                                                             |   |
|               |                                  |                                                  |                                                                 |           |                                                         |                                                                                                                             |   |
|               |                                  |                                                  |                                                                 |           |                                                         |                                                                                                                             |   |



Whittaker et al., Risk factors for knee osteoarthritis after knee trauma

|                                                      |                                         |   |
|------------------------------------------------------|-----------------------------------------|---|
| Cartilage tear/other (Y vs N <sup>1</sup> )          | KOA 11-yr 5.2 (3.8,7.0) <sup>2</sup>    | - |
|                                                      | KOA 12-19-yr 2.4 (1.5,3.9) <sup>2</sup> |   |
|                                                      | 19-yr RD 6.9 (3.5,10.2) <sup>2</sup>    |   |
| Knee injury (any; Y vs N <sup>1</sup> )              | KOA 11-yr 5.7 (5.0,6.6) <sup>2</sup>    | - |
|                                                      | KOA 12-19-yr 3.4 (2.9,4.0) <sup>2</sup> |   |
|                                                      | 19-yr RD 8.1 (6.7,9.4) <sup>2</sup>     |   |
| Knee injury (men; Y vs N <sup>1</sup> )              | KOA 11-yr 5.3 (4.5,6.3) <sup>2</sup>    | - |
|                                                      | KOA 12-19-yr 2.9 (2.3,3.6) <sup>2</sup> |   |
|                                                      | 19-yr RD 7.3 (5.7,8.9) <sup>2</sup>     |   |
| Knee injury (women; Y vs N <sup>1</sup> )            | KOA 11-yr 6.5 (5.1,8.1) <sup>2</sup>    | - |
|                                                      | KOA 12-19-yr 4.1 (3.2,5.3) <sup>2</sup> |   |
|                                                      | 19-yr RD 9.5 (6.9,12.1) <sup>2</sup>    |   |
| Knee injury (≤30 years of age; Y vs N <sup>1</sup> ) | KOA 11-yr 7.6 (6.2,9.3) <sup>2</sup>    | - |
|                                                      | KOA 12-19-yr 4.8 (3.8,6.2) <sup>2</sup> |   |
|                                                      | 19-yr RD 8.6 (6.9,10.4) <sup>2</sup>    |   |
| Knee injury (> 30 years of age Y vs N <sup>1</sup> ) | KOA 11-yr 4.7 (3.9,5.7) <sup>2</sup>    | - |
|                                                      | KOA 12-19-yr 2.6 (2.0,3.2) <sup>2</sup> |   |
|                                                      | 19-yr RD 8.0 (5.9,10.1) <sup>2</sup>    |   |

**Bold** (statistically significant). ACL (Anterior cruciate ligament tear, no concomitant injury), ACL+ (ACL tear+concomitant injury), ACL? (ACL tear, concomitant injury unknown), ACLRc (ACL tear reconstruction), ACLRp (ACL tear repair), ACLnoSx (ACL tear no Sx), AKP (anterior knee pain), CI (95% confidence interval), HR (hazard ratio), KL (Kellgren-Lawrence OA grade), KOA (knee OA inclusive of all compartments), mo (months), mm (millimeters), N (no), NR (not reported), NS (author reported not statistically significant), OA (osteoarthritis), PFJ (patellofemoral joint), PT (patellar tendon graft), RD (risk difference), RR (risk ratio), ST (semitendinosus graft), Sx (surgery), TF (tibiofemoral joint), UC (unable to calculate), Y (yes), yr (years).

<sup>1</sup>reference group. <sup>2</sup>multivariable analysis.

## Whittaker et al., Risk factors for knee osteoarthritis after knee trauma

## 6. Summary of Structural Osteoarthritis Estimates

| Author          | Primary Injury (Treatment) | Method of OA Identification | OA Definition   | Participants with Structural OA (n, %)                 | Comparison(s)                                          | Statistical Estimate Reported OR (95%CI, p-value)                                                           | Re-calculated OR (95%CI)                             |
|-----------------|----------------------------|-----------------------------|-----------------|--------------------------------------------------------|--------------------------------------------------------|-------------------------------------------------------------------------------------------------------------|------------------------------------------------------|
| Aga, 2018       | ACL+ (ACLRc)               | Radiograph (KL)             | NR <sup>1</sup> | 2 (2%)                                                 | Double vs single bundle <sup>2</sup>                   | NR (NS)                                                                                                     | KOA 1.2 (.07,18.9)                                   |
| Ahlden, 2009    | ACL+ (ACLRc)               | Radiograph (Ahlback)        | NR <sup>1</sup> | 5 (11%)                                                | ST <sup>2</sup> vs PT autograft                        | Medial TF OA p=.69<br>Lateral OA p=.54                                                                      | Medial TF OA .7 (.13,4.7)<br>Lateral TF .3 (.05,3.2) |
| Ahn, 2012       | ACL+ (ACLRc)               | Radiograph (IKDC)           | C or D          | Medial TF 36 (31%)<br>Lateral TF 11 (9%)<br>PFJ 9 (8%) | Age at surgery <sup>3</sup>                            | Medial TF OA 1.1 (1.0,1.2) <sup>3</sup><br>Lateral TF OA .8 (.24,2.8) <sup>3</sup>                          | -                                                    |
|                 |                            |                             |                 |                                                        | BMI at surgery                                         | Medial TF OA 1.0 (.8,1.2) <sup>3</sup><br>Lateral TF OA 1.6 (1.0, 2.3) <sup>3</sup>                         | -                                                    |
|                 |                            |                             |                 |                                                        | Injury to surgery                                      | Medial TF OA 1.0 (.99,1.0) <sup>3</sup><br>Lateral TF OA 1.0 (.98,1.0) <sup>3</sup>                         | -                                                    |
|                 |                            |                             |                 |                                                        | Partial meniscectomy (Y vs N <sup>2</sup> )            | <b>Medial TF OA 20.7 (2.3,177)<sup>3,4</sup></b><br>Lateral TF OA .8 (.04,17.5) <sup>3,4</sup>              | -                                                    |
|                 |                            |                             |                 |                                                        | Sub-total meniscectomy (Y vs N <sup>2</sup> )          | Medial TF OA 8.9 (.67,119) <sup>3</sup><br>Lateral TF OA 2.0 (.9, 87) <sup>3</sup>                          | -                                                    |
|                 |                            |                             |                 |                                                        | Medial proximal tibial angle                           | Medial TF OA 1.0 (.84,1.4) <sup>3</sup><br>Lateral TF OA 1.5 (.70,3.2) <sup>3</sup>                         | -                                                    |
|                 |                            |                             |                 |                                                        | Anatomic axis angle                                    | Medial TF OA 1.0 (.84,1.4) <sup>3</sup><br>Lateral TF OA .73 (.5,2.3) <sup>3</sup>                          | -                                                    |
|                 |                            |                             |                 |                                                        | Age at injury                                          | Medial OA 1.0 (.97, 1.1) <sup>3</sup><br>Lateral OA 1.0 (.97, 1.1)<br>PFJ OA 1.0 (.96, 1.1)                 | -                                                    |
|                 |                            |                             |                 |                                                        | Male sex vs female sex <sup>2</sup>                    | Medial OA 1.2 (.5,3.1) <sup>3</sup><br>Lateral OA 1.4 (.6,3.1)<br>PFJ OA 2.2 (.94,5.3)                      | -                                                    |
|                 |                            |                             |                 |                                                        | BMI ≥25, 2-yr post-ACLRc (Y vs N <sup>2</sup> )        | <b>Medial OA 3.1 (1.2,7.9)<sup>3</sup></b><br>Lateral OA 1.7 (.73,3.8)<br><b>PFJ OA 3.5 (1.5,7.8)</b>       | -                                                    |
| Barenus, 2014   | ACL+ (ACLRc)               | Radiograph (KL)             | ≥2              | 81 (60%)                                               | Injury to surgery (<6 vs ≥6 mo)                        | Lateral TF OA 1.0 (.4,2.3)<br>PFJ OA .9 (.4,2.0)                                                            | -                                                    |
|                 |                            |                             |                 |                                                        | Injury to surgery (<12 vs ≥12 mo)                      | Lateral TF OA 1.5 (.6,3.7)<br>PFJ OA 1.1 (.48,2.6)                                                          | -                                                    |
|                 |                            |                             |                 |                                                        | Manual occupation at injury (Y vs N <sup>2</sup> )     | Medial TF OA 2.0 (.5,7.4) <sup>3</sup><br>Lateral TF OA 1.2 (.4, 3.5)<br>PFJ OA 1.4 (.5,4.1)                | -                                                    |
|                 |                            |                             |                 |                                                        | Pivot Shift ≥1, 2-yr post-ACLRc (Y vs N <sup>2</sup> ) | Medial TF OA 2.1 (.8,5.4) <sup>3</sup><br>Lateral TF OA .7 (.3,1.8)<br>PFJ OA .6 (.2,1.6)                   | -                                                    |
|                 |                            |                             |                 |                                                        | Medial meniscus resection (Y vs N <sup>2</sup> )       | <b>Medial TF OA 3.6 (1.4,9.3)<sup>3</sup></b><br>Lateral TF OA 1.5 (.7,3.6)<br><b>PFJ OA 2.3 (1.01,5.2)</b> | -                                                    |
|                 |                            |                             |                 |                                                        | Lateral meniscus resection (Y vs N <sup>2</sup> )      | <b>Lateral OA 5.1 (2.1,12.3)</b><br>PFJ OA 1.7 (.7,4.0)                                                     | -                                                    |
|                 |                            |                             |                 |                                                        | Medial meniscus suture (Y vs N <sup>2</sup> )          | Medial OA .5 (.1,2.5)<br>PFJ OA .8 (.2,3.1)                                                                 | -                                                    |
|                 |                            |                             |                 |                                                        | Lateral meniscus suture (Y vs N <sup>2</sup> )         | Lateral OA .5 (.06,4.6)<br>PFJ OA .5 (.1,4.2)                                                               | -                                                    |
|                 |                            |                             |                 |                                                        | ST vs PT autograft <sup>2</sup>                        | Medial TF OA 1.7 (.7,3.9) <sup>3</sup><br>Lateral TF OA 2.3 (1.0,5.4)<br>PFJ OA 1.2 (.5,2.6)                | -                                                    |
| Bjornsson, 2016 | ACL+ (ACLRc)               | Radiograph (KL)             | NR <sup>1</sup> | TF 65 (39%)<br>PFJ 67 (47%)                            | ST <sup>2</sup> vs PT autograft                        | TF OA p=.53<br>PFJ OA p=.67                                                                                 | TF OA 0.9 (.4,1.7)<br>PFJ OA 1.14(.6,2.2)            |

## Whittaker et al., Risk factors for knee osteoarthritis after knee trauma

|                                               |                                           |                             |                   |                                                           |                                                                   |                                                                                  |                                                                                          |
|-----------------------------------------------|-------------------------------------------|-----------------------------|-------------------|-----------------------------------------------------------|-------------------------------------------------------------------|----------------------------------------------------------------------------------|------------------------------------------------------------------------------------------|
| Cantin, 2016                                  | ACL+ (ACLRc)                              | Radiograph (IKDC)           | C or D            | 112 (19%)                                                 | Age at surgery (>34 yr)                                           | NR                                                                               | UC                                                                                       |
|                                               |                                           |                             |                   |                                                           | Residual laxity (Y vs N)                                          | NR                                                                               | UC                                                                                       |
|                                               |                                           |                             |                   |                                                           | Stage 3 or 4 cartilage lesion (Y vs N)                            | NR                                                                               | UC                                                                                       |
|                                               |                                           |                             |                   |                                                           | Medial and lateral meniscectomy (Y vs N)                          | NR                                                                               | UC                                                                                       |
| Castoldi, 2020                                | ACL+ (ACLRc)                              | Radiograph (Ahlback, Iwano) | ≥1                | Medial TF 32 (71%)<br>Lateral TF 18 (40%)<br>PFJ 30 (67%) | PT <sup>2</sup> vs PT with LET                                    | Medial TF OA p=.7<br>Lateral TF OA p<.02<br>PFJ OA p=.4                          | Medial TF OA .8 (.2,2.8)<br><b>Lateral TF OA 5.2 (1.3,19.2)</b><br>PFJ OA 1.7 (.5,6.0)   |
|                                               |                                           |                             |                   |                                                           | ACLRc vs uninjured knee <sup>2</sup>                              | Medial TF OA p=.6<br>Lateral TF OA p<.0001<br>PFJ OA p=.09                       | Medial TF OA 1.2 (.5,3.0)<br><b>Lateral TF OA 14.3 (1.9,66.7)</b><br>PFJ OA 2.1 (.9,4.9) |
| Culvenor, 2017                                | ACL+ (ACLRc)                              | Radiograph (KL)             | ≥2 or osteophytes | 15-yr 130 (72%)<br>20-yr 115 (81%)                        | AKP 1-yr post-ACLRc (Y vs N <sup>2</sup> )                        | KOA 15-yr RR .9 (.6,1.4) <sup>3</sup><br>KOA 20-yr RR .9 (.6,1.5) <sup>3</sup>   | -                                                                                        |
|                                               |                                           |                             |                   |                                                           | AKP 2-yr post-ACLRc (Y vs N <sup>2</sup> )                        | KOA 15-yr RR .98 (.6,1.6) <sup>3</sup><br>KOA 20-yr RR .9 (.6,1.5) <sup>3</sup>  | -                                                                                        |
|                                               |                                           |                             |                   |                                                           | AKP 1 or 2-yr post-ACLRc (Y vs N <sup>2</sup> )                   | KOA 15-yr RR 1.1 (.6,2.1) <sup>3</sup><br>KOA 20-yr RR 1.0 (.5,2.1) <sup>3</sup> | -                                                                                        |
| Curado, 2019                                  | ACL+ (ACLRc)                              | Radiograph (IKDC)           | C or D            | 53 (29%)                                                  | Age >30 at surgery (Y vs N)                                       | NR                                                                               | UC                                                                                       |
|                                               |                                           |                             |                   |                                                           | Return to pivot sport (Y vs N)                                    | NR                                                                               | UC                                                                                       |
|                                               |                                           |                             |                   |                                                           | Meniscectomy (present or future; Y vs N)                          | NR                                                                               | UC                                                                                       |
|                                               |                                           |                             |                   |                                                           | Residual Laxity (IKDC C or D, Y vs N <sup>2</sup> )               | NR                                                                               | UC                                                                                       |
| Drogset, 2006                                 | ACL+ (ACLRc, ACLRp)                       | Radiograph (Ahlback)        | NR <sup>1</sup>   | 9 (9%)                                                    | Primary repair vs PT autograft <sup>2</sup>                       | NR                                                                               | KOA 1.4 (.3,6.3)                                                                         |
| Drogest, 2002                                 | ACL+ (ACLRc)                              | Radiograph (Ahlback)        | NR <sup>1</sup>   | 34 (50%)                                                  | PT <sup>2</sup> vs PT with augmentation                           | NR                                                                               | KOA .3 (.1,2.4)                                                                          |
|                                               |                                           |                             |                   |                                                           | PT <sup>2</sup> vs PT with augmentation                           | NR                                                                               | KOA 1.23 (.8,5.4)                                                                        |
|                                               |                                           |                             |                   |                                                           | Meniscus tear (Y vs N)                                            | NR (NS)                                                                          | UC                                                                                       |
| Elveos 2018                                   | ACL+ (ACLRc)                              | Radiograph (Ahlback)        | ≥3                | 15 (27%)                                                  | Cartilage Injury (Y vs N)                                         | KOA p=0.005                                                                      | <b>KOA 4.4 (1.7,12.2)</b>                                                                |
|                                               |                                           |                             |                   |                                                           | PT <sup>2</sup> vs PT with augmentation                           | KOA p=0.37                                                                       | KOA .6 (.2,1.9)                                                                          |
| Fillbay 2021                                  | ACL+ (ACLRp, ACLRc, ACLnoSx)              | Radiograph (KL)             | ≥2                | TF 79 (62%)<br>PF 41 (32%)                                | Male vs female <sup>2</sup> sex                                   | TF OA 1.3 (.5,3.4)<br>PFJ OA 1.8 (.6,4.8)                                        | -                                                                                        |
|                                               |                                           |                             |                   |                                                           | Early ACLRc <sup>2</sup> vs delayed ACLRc                         | TF OA 4.1 (.6,27.0)<br>PFJ OA 1.1 (.2,6.8)                                       | -                                                                                        |
|                                               |                                           |                             |                   |                                                           | Early ACLRc <sup>2</sup> vs rehabilitation                        | TF OA 2.0 (.8,5.0)<br>PFJ OA .4 (.2,1.3)                                         | -                                                                                        |
|                                               |                                           |                             |                   |                                                           | Meniscus tear (Y vs N <sup>2</sup> )                              | TF OA 2.7 (1.0,7.6)<br>PFJ OA 1.0 (.3,3.1)                                       | -                                                                                        |
|                                               |                                           |                             |                   |                                                           | Meniscal surgery (Y vs no tear <sup>2</sup> )                     | <b>TF OA 3.0 (1.2,7.8)</b><br>PFJ OA 1.2 (.4,3.6)                                | -                                                                                        |
|                                               |                                           |                             |                   |                                                           | Knee extension strength asymmetry at 4-yrs (Y vs N <sup>2</sup> ) | TF OA .7 (.3,1.8)<br>PFJ OA .4 (.1, 1.2)                                         | -                                                                                        |
|                                               |                                           |                             |                   |                                                           | Knee flexion strength asymmetry at 4-yrs (Y vs N <sup>2</sup> )   | TF OA 1.2 (.4,3.7)<br>PFJ OA 2.6 (.8,8.8)                                        | -                                                                                        |
|                                               |                                           |                             |                   |                                                           | Hop distance asymmetry at 4-yrs (Y vs N <sup>2</sup> )            | TF OA 1.0 (.3,3.2)<br><b>PFJ OA 5.1 (1.4,18.7)</b>                               | -                                                                                        |
|                                               |                                           |                             |                   |                                                           | Knee extension ROM loss at 4-yrs (Y vs N <sup>2</sup> )           | TF OA 1.3 (.4,4.1),<br>PFJ OA 3.6 (1.0,13.5)                                     | -                                                                                        |
|                                               |                                           |                             |                   |                                                           | Knee flexion ROM loss at 4-yrs (Y vs N <sup>2</sup> )             | TF OA 1.8 (.7,4.6)<br>PFJ OA 1.0 (.4,2.9)                                        | -                                                                                        |
|                                               |                                           |                             |                   |                                                           | Anterior tibial translation at 4-yr >3 mm (Y vs N <sup>2</sup> )  | TF OA 1.0 (.4,2.4)<br>PFJ OA 1.7 (.6,4.4)                                        | -                                                                                        |
|                                               |                                           |                             |                   |                                                           | Tegner Score (0-5 vs. 6-10 <sup>3</sup> )                         | TF OA .8 (.3,2.0)<br>PFJ OA .5 (.2,1.4)                                          | -                                                                                        |
| Lysholm Score (0-83 vs. 84-100 <sup>2</sup> ) | TF OA 1.6 (.6,4.6)<br>PFJ OA 1.5 (.5,4.6) | -                           |                   |                                                           |                                                                   |                                                                                  |                                                                                          |

## Whittaker et al., Risk factors for knee osteoarthritis after knee trauma

|                       |                       |                          |                                                                                                                                                  |                                                                  |                                                                 |                                                                                                                            |                                                                                             |
|-----------------------|-----------------------|--------------------------|--------------------------------------------------------------------------------------------------------------------------------------------------|------------------------------------------------------------------|-----------------------------------------------------------------|----------------------------------------------------------------------------------------------------------------------------|---------------------------------------------------------------------------------------------|
| Frobell 2013          | ACL+ (ACLRc, ACLnoSx) | Radiograph (mOARSI)      | JSN grade ≥2 (TF only), OR sum of compartment specific marginal osteophyte(s) grade ≥2, OR compartment specific JSN grade 1 + osteophyte grade 1 | TF 13 (12%)<br>PFJ 22 (19%)                                      | Early ACLRc <sup>2</sup> vs delayed(optional) ACLRc             | TF OA p=0.17<br>PFJ OA p=0.20                                                                                              | TF OA .4 (.2,1.5)<br>PFJ OA .5 (.2,1.4)                                                     |
|                       |                       |                          |                                                                                                                                                  |                                                                  | Early ACLRc <sup>2</sup> vs delayed ACLRc                       | TF OA p=0.25<br>PFJ OA p=0.21                                                                                              | TF OA .2 (.1, 1.6)<br>PFJ OA .8 (.4, 2.4)                                                   |
|                       |                       |                          |                                                                                                                                                  |                                                                  | Early ACLRc <sup>2</sup> vs rehabilitation                      | TF OA p=0.25<br>PFJ OA p=0.21                                                                                              | TF OA .7 (.3 2.9)<br>PFJ OA .3 (.1, 1.3)                                                    |
| Gifstad, 2013         | ACL+ (ACLRc)          | Radiograph (KL)          | ≥2                                                                                                                                               | NR                                                               | Primary ACLRc vs ACLRc Revision                                 | KOA p=0.45                                                                                                                 | UC                                                                                          |
| Gudas, 2012           | Cartilage (OCD, ACD)  | Radiograph (KL)          | NR <sup>1</sup>                                                                                                                                  | 21 (37%)                                                         | OAT vs MF <sup>2</sup>                                          | KOA p=.083                                                                                                                 | KOA .4 (.23,1.1)                                                                            |
| Haberfield, 2021      | ACL+ (ACLRc)          | Radiograph (OARSI)       | JSN grade ≥2 OR osteophyte grade ≥2 OR grade 1 JSN + grade 1 osteophyte                                                                          | 15 (19%)                                                         | Return to pivot sport at 1 yr (Y vs N <sup>2</sup> )            | KOA 5-yr RR .5 (.1,2.4) <sup>3</sup>                                                                                       | -                                                                                           |
|                       |                       |                          |                                                                                                                                                  |                                                                  | Return to pivot sport (Y vs N <sup>2</sup> )                    | KOA 5-yr RR .6 (.2,2.2) <sup>3</sup>                                                                                       | -                                                                                           |
| Hamrin Senorski, 2019 | ACL+ (ACLRc)          | Radiograph (KL)          | ≥2                                                                                                                                               | 53 (43%)                                                         | Age at surgery                                                  | KOA 2.3 (1.3,3.9) <sup>3</sup>                                                                                             | -                                                                                           |
|                       |                       |                          |                                                                                                                                                  |                                                                  | Injury to surgery                                               | KOA 2.3 (1.0,5.0) <sup>3</sup>                                                                                             | -                                                                                           |
| Holm, 2012            | ACL+ (ACLRc)          | Radiograph (KL)          | ≥2                                                                                                                                               | TF 42 (79%)<br>PFJ 15 (28%)                                      | Open vs endoscopic <sup>2</sup> ACLRc                           | TF OA p=1.0<br>PFJ OA p=.09                                                                                                | TF OA 1.1 (.3,4.1)<br>PFJ OA .5 (.2,1.6)                                                    |
| Holm, 2010            | ACL? (ACLRc)          | Radiograph (KL)          | ≥2                                                                                                                                               | 34 (60%)                                                         | ST <sup>2</sup> vs PT autograft                                 | KOA p=.27                                                                                                                  | KOA 1.5 (.5,4.2)                                                                            |
| Hoogeslag, 2019       | ACL+ (ACLRc, ACLRp)   | Radiograph (KL)          | NR <sup>1</sup>                                                                                                                                  | 0 (0%)                                                           | ACLRc vs ACLRp                                                  | NR                                                                                                                         | KOA 1                                                                                       |
| Janssen, 2013         | ACL+ (ACLRc)          | Radiograph (KL, Ahlback) | KL ≥3<br>Ahlback ≥1                                                                                                                              | 46 (53%)                                                         | Age at surgery                                                  | NR (NS) <sup>3</sup>                                                                                                       | UC                                                                                          |
|                       |                       |                          |                                                                                                                                                  |                                                                  | Medial meniscectomy (past or current; Y vs N <sup>2</sup> )     | KOA 4.0 (1.4, 11.5) <sup>3</sup>                                                                                           | -                                                                                           |
|                       |                       |                          |                                                                                                                                                  |                                                                  | ICRS grade ≥3 (Y vs N <sup>2</sup> )                            | KOA 5.2 (1.1, 24.8) <sup>3</sup>                                                                                           | -                                                                                           |
|                       |                       |                          |                                                                                                                                                  |                                                                  | Pre-ACLRc hop distance (IKDC ≥C vs A or B <sup>2</sup> )        | NR (NS) <sup>3</sup>                                                                                                       | UC                                                                                          |
| Johnson, 2016         | ACL+ (ACLRc)          | Radiograph (IKDC)        | B, C or D                                                                                                                                        | 2-yr 5 (4%)<br>5-yr 12 (13%)<br>10-yr 17 (15%)<br>15-yr 89 (63%) | Age at surgery (≤25 <sup>2</sup> vs 26-34)                      | KOA 2-yr p=0.004<br>KOA 5-yr p=0.04<br>KOA 10-yr p>.999<br>KOA 15-yr p=0.65                                                | KOA 2-yr UC<br>KOA 5-yr 2.8 (.7,10.2)<br>KOA 10-yr 19.7 (1.2,155)<br>KOA 15-yr 1.1 (.6,2.3) |
|                       |                       |                          |                                                                                                                                                  |                                                                  | Male vs female <sup>2</sup> sex                                 | Lateral TF OA 1.3 (.9,1.9) <sup>3</sup><br>Medial TF OA 1.2 (.9,1.8) <sup>3</sup><br>KOA 1.3 (.9,1.8) <sup>3</sup>         | -                                                                                           |
| Jones 2019            | ACL+ (ACLRc)          | Radiograph (mOARSI)      | Sum of osteophytes, JSN, femoral sclerosis, and attrition (Medial TF only to a maximum of 11 (Medial TF) and 10 (Lateral TF)                     | NR                                                               | Age at surgery                                                  | Lateral TF OA 0.98 (0.9,1.02) <sup>3</sup><br>Medial TF OA 1.1 (1.02,1.10) <sup>3</sup><br>KOA 1.0 (0.98,1.1) <sup>3</sup> | -                                                                                           |
|                       |                       |                          |                                                                                                                                                  |                                                                  | BMI at surgery                                                  | Lateral TF OA 1.0 (0.97,1.1) <sup>3</sup><br>Medial TF OA 1.1 (1.0,1.1) <sup>3</sup><br>KOA 1.04 (0.99,1.1) <sup>3</sup>   | -                                                                                           |
|                       |                       |                          |                                                                                                                                                  |                                                                  | Marx Activity Score at ACLRc                                    | Lateral TF OA 0.99 (0.95,1.0) <sup>3</sup><br>Medial TF OA 1.0 (0.98,1.1) <sup>3</sup><br>KOA 1.0 (0.96,1.1) <sup>3</sup>  | -                                                                                           |
|                       |                       |                          |                                                                                                                                                  |                                                                  | PT autograft <sup>2</sup> vs allograft                          | Lateral TF OA 1.3 (0.6,2.9) <sup>3</sup><br>Medial TF OA 1.11(0.5,2.4) <sup>3</sup><br>KOA 1.3 (0.6,2.8) <sup>3</sup>      | -                                                                                           |
|                       |                       |                          |                                                                                                                                                  |                                                                  | ST vs PT autograft <sup>2</sup>                                 | Lateral TF OA 1.2 (0.8,1.7) <sup>3</sup><br>Medial TF OA 0.9 (0.6,1.4) <sup>3</sup><br>KOA 1.1 (0.7,1.6) <sup>3</sup>      | -                                                                                           |
|                       |                       |                          |                                                                                                                                                  |                                                                  | Lateral cartilage status (Grade 1 <sup>2</sup> vs 2-4)          | Lateral TF OA 0.9 (0.5,1.5) <sup>3</sup><br>KOA 1.5 (0.9,2.6) <sup>3</sup>                                                 | -                                                                                           |
|                       |                       |                          |                                                                                                                                                  |                                                                  | Lateral meniscus (no tear <sup>2</sup> vs repair)               | Lateral TF OA 2.0 (1.0,3.8) <sup>3</sup><br>KOA 1.3 (0.7,2.7) <sup>3</sup>                                                 | -                                                                                           |
|                       |                       |                          |                                                                                                                                                  |                                                                  | Lateral meniscus (no tear <sup>2</sup> vs partial meniscectomy) | Lateral TF OA 3.0 (2.0,4.5) <sup>3</sup><br>KOA 2.2 (1.5,3.3) <sup>3</sup>                                                 | -                                                                                           |
|                       |                       |                          |                                                                                                                                                  |                                                                  |                                                                 |                                                                                                                            |                                                                                             |
|                       |                       |                          |                                                                                                                                                  |                                                                  |                                                                 |                                                                                                                            |                                                                                             |

## Whittaker et al., Risk factors for knee osteoarthritis after knee trauma

|                     |                              |                                 |                                                                                                                                                            |                             |                                                                    |                                                                                                     |                                                  |
|---------------------|------------------------------|---------------------------------|------------------------------------------------------------------------------------------------------------------------------------------------------------|-----------------------------|--------------------------------------------------------------------|-----------------------------------------------------------------------------------------------------|--------------------------------------------------|
| Jones 2019<br>cont. |                              |                                 |                                                                                                                                                            |                             | Lateral meniscus (no tear <sup>2</sup> vs untreated tear)          | Lateral TF OA 1.1 (0.7,1.8) <sup>3</sup><br>KOA 1.1 (0.6,1.7) <sup>3</sup>                          | -                                                |
|                     |                              |                                 |                                                                                                                                                            |                             | Medial cartilage status (Grade 1 <sup>2</sup> vs Grade 2-4)        | Medial TF OA 1.6 (0.8,3.0) <sup>3</sup><br>KOA 1.0 (0.5,2.0) <sup>3</sup>                           | -                                                |
|                     |                              |                                 |                                                                                                                                                            |                             | Medial meniscus (no tear <sup>2</sup> vs repair)                   | <b>Medial TF OA 1.9 (1.2,3.0)<sup>3</sup></b><br><b>KOA 1.8 (1.2,2.9)<sup>3</sup></b>               | -                                                |
|                     |                              |                                 |                                                                                                                                                            |                             | Medial meniscus (no tear <sup>2</sup> vs partial meniscectomy)     | <b>Medial TF OA 2.1 (1.1,3.9)<sup>3</sup></b><br>KOA 1.7 (0.9,3.2) <sup>3</sup>                     | -                                                |
|                     |                              |                                 |                                                                                                                                                            |                             | Medial meniscus (no tear <sup>2</sup> vs untreated tear)           | Medial TF OA: 0.9 (0.5,1.7) <sup>3</sup><br>KOA 0.0 (0.5,1.5) <sup>3</sup>                          | -                                                |
| Jonsson, 2004       | ACL+ (ACLRc)                 | Radiograph (Fairbanks)          | NR <sup>1</sup>                                                                                                                                            | 12 (19%)                    | Pivot shift (present vs absent <sup>2</sup> )                      | KOA p=0.1                                                                                           | UC                                               |
|                     |                              |                                 |                                                                                                                                                            |                             | Anterior tibial translation at 2-yr >2.5 mm (Y vs N <sup>2</sup> ) | KOA p=.09                                                                                           | KOA .3 (.1,1.1)                                  |
| Karikis, 2016       | ACL+ (ACLRc)                 | Radiograph (KL)                 | NR <sup>1</sup>                                                                                                                                            | 19 (23%)                    | Double vs single bundle <sup>2</sup>                               | TF OA p=.64<br>PFJ OA p=.35                                                                         | TF OA 1.2 (.4,3.4)<br>PFJ OA .5 (.2,1.4)         |
|                     |                              |                                 |                                                                                                                                                            |                             | Age at surgery (10-yr units)                                       | KOA 1.7 (1.0,2.9) <sup>3</sup>                                                                      | -                                                |
| Kessler, 2008       | ACL (ACLRc, ACLnoSx)         | Radiograph (KL)                 | ≥2                                                                                                                                                         | 29 (27%)                    | BMI at surgery                                                     | KOA 1.2 (1.0,1.3) <sup>3</sup>                                                                      | -                                                |
|                     |                              |                                 |                                                                                                                                                            |                             | ACLRc vs ACLNoSx <sup>2</sup>                                      | <b>KOA 2.8 (1.1,7.5)<sup>3</sup></b>                                                                | -                                                |
|                     |                              |                                 |                                                                                                                                                            |                             | Allocation to ACLRc <sup>2</sup> vs ACLnoSx                        | NR                                                                                                  | <b>TF OA 2.4 (1.2,4.7)</b><br>PFJ OA .6 (.3,1.2) |
| Kvist, 2020         | ACL+ (ACLRc, ACLnoSx)        | Radiograph (KL)                 | ≥2                                                                                                                                                         | TF 95 (62%)<br>PFJ 48 (35%) | ACLnoSx vs ACL surgery <sup>2</sup>                                | NR                                                                                                  | <b>TF OA 2.5 (1.4,5.3)</b><br>PFJ OA .9 (.5,1.9) |
|                     |                              |                                 |                                                                                                                                                            |                             | ACLnoSx <sup>2</sup> vs Delayed ACLRc                              | NR                                                                                                  | TF OA .6 (.2,1.5)<br>PFJ OA .7 (.3,1.8)          |
|                     |                              |                                 |                                                                                                                                                            |                             | Early ACLRc <sup>2</sup> vs Delayed ACLRc                          | NR                                                                                                  | TF OA 1.8 (.9,4.1)<br>PFJ OA .5 (.2,1.2)         |
|                     |                              |                                 |                                                                                                                                                            |                             | Future surgery (Y vs N)                                            | KOA p=0.73                                                                                          | UC                                               |
| Leys, 2012          | ACL+ (ACLRc)                 | Radiograph (IKDC)               | NR <sup>1</sup>                                                                                                                                            | 54 (50%)                    | ST <sup>2</sup> vs PT autograft                                    | <b>KOA 2.8 (1.2,6.2)</b>                                                                            | KOA 2.2 (.99,4.7)                                |
| Li, 2011            | ACL+ (ACLRc)                 | Radiograph (KL)                 | ≥2- grade bilateral difference in 1 compartment OR ≥1- grade bilateral difference in 2 compartments                                                        | NR                          | BMI >25 at surgery (Y vs N <sup>2</sup> )                          | <b>KOA 2.0 (1.1,3.8)<sup>3</sup></b>                                                                | -                                                |
|                     |                              |                                 |                                                                                                                                                            |                             | BMI >30 at surgery (Y vs N <sup>2</sup> )                          | <b>KOA 3.2 (1.3,7.8)<sup>3</sup></b>                                                                | -                                                |
|                     |                              |                                 |                                                                                                                                                            |                             | Length of follow-up                                                | <b>KOA 1.2 (1.1,1.2)<sup>3</sup></b>                                                                | -                                                |
|                     |                              |                                 |                                                                                                                                                            |                             | Medial meniscectomy (yes vs no <sup>2</sup> )                      | <b>KOA 3.1 (1.4,6.9)<sup>3</sup></b>                                                                | -                                                |
|                     |                              |                                 |                                                                                                                                                            |                             | Grade ≥2 medial cartilage chondrolysis (Y vs N <sup>2</sup> )      | <b>KOA 2.9 (1.3,6.7)<sup>3</sup></b>                                                                | -                                                |
| Lohmander, 2004     | ACL+ (ACLRc, ACLnoSx)        | Radiograph (KL)                 | ≥2                                                                                                                                                         | 34 (51%)                    | ACLRc vs ACLNoSx <sup>2</sup>                                      | KOA 1.7 (.6,5.0) <sup>3</sup><br>TF OA 1.3 (.5,3.9) <sup>3</sup><br>PFJ OA 14 (.9,224) <sup>3</sup> | -                                                |
|                     |                              |                                 |                                                                                                                                                            |                             | Meniscus surgery vs no injury <sup>2</sup>                         | <b>KOA 3.6 (1.2,11)</b>                                                                             | -                                                |
| Mascarenhas, 2010   | ACL+ (ACLRc)                 | Radiograph (KL)                 | ≥2                                                                                                                                                         | 18 (53%)                    | Autograft vs allograft <sup>2</sup>                                | KOA p=0.99                                                                                          | KOA 1.0 (.3,3.8)                                 |
| Meuffels, 2008      | ACL+ (ACLRc, ACLnoSx)        | Radiograph (KL)                 | ≥2                                                                                                                                                         | 19 (38%)                    | ACLRc vs ACLNoSx <sup>2</sup>                                      | KOA p=0.145                                                                                         | KOA 2.4 (.7,7.7) <sup>6</sup>                    |
| Meunier, 2007       | ACL+ (ACLRc, ACLnoSx, ACLRp) | Radiograph (mAhlback, Fairbank) | NR <sup>1</sup>                                                                                                                                            | 48 (52%)                    | Meniscectomy (Y vs N)                                              | KOA p=0.02                                                                                          | UC                                               |
|                     |                              |                                 |                                                                                                                                                            |                             | ACLRp <sup>2</sup> vs ACLnoSx                                      | NR (NS)                                                                                             | KOA .38 (.1,1.7)                                 |
|                     |                              |                                 |                                                                                                                                                            |                             | ACLRp <sup>2</sup> vs ACLRp with augmentation                      | NR (NS)                                                                                             | KOA .35 (.1,1.6)                                 |
|                     |                              |                                 |                                                                                                                                                            |                             | ACLRp <sup>2</sup> vs Delayed ACLRc                                | NR (NS)                                                                                             | KOA .7 (.1,3.9)                                  |
| Neuman, 2017        | ACL+ (ACLRc, ACLnoSx)        | Radiograph (mOARSI)             | JSN grade ≥2 in any 2 TF or PF compartments OR osteophyte score ≥2 in any 2 TF or PF compartments OR compartment specific JSN grade 1 + osteophyte grade 1 | NR                          | Acute Aggrecan                                                     | KOA 1.0 (.995,1.0)                                                                                  | -                                                |
|                     |                              |                                 |                                                                                                                                                            |                             | Chronic Aggrecan                                                   | KOA 1.0 (.99,1.0)                                                                                   | -                                                |
|                     |                              |                                 |                                                                                                                                                            |                             | Acute COMP                                                         | KOA 1.0 (.98,1.0)                                                                                   | -                                                |
|                     |                              |                                 |                                                                                                                                                            |                             | Chronic COMP                                                       | KOA 1.1 (.99,1.1)                                                                                   | -                                                |
|                     |                              |                                 |                                                                                                                                                            |                             | Acute MMP-3                                                        | KOA 1.0 (.99,1.0)                                                                                   | -                                                |
|                     |                              |                                 |                                                                                                                                                            |                             | Chronic MMP-3                                                      | KOA 1.0 (.98,1.1)                                                                                   | -                                                |
|                     |                              |                                 |                                                                                                                                                            |                             | Acute TIMP-1                                                       | KOA .99 (.95,1.0)                                                                                   | -                                                |
|                     |                              |                                 |                                                                                                                                                            |                             | Chronic TIMP-1                                                     | KOA 1.3 (.98,1.7)                                                                                   | -                                                |
| Neuman, 2008        | ACL+ (ACLRc, ACLnoSx)        | Radiograph (mOARSI)             | osteophyte grade 1                                                                                                                                         | 13 (16%)                    | Meniscus tear (Y vs N)                                             | KOA p<0.0001                                                                                        | UC                                               |
|                     |                              |                                 |                                                                                                                                                            |                             | Delayed ACLRc vs no-surgery <sup>2</sup>                           | KOA p=0.03                                                                                          | <b>KOA 4.8 (1.6,17.1)</b>                        |
|                     |                              |                                 |                                                                                                                                                            |                             | Delayed ACLRc + meniscus tear (Y vs N <sup>2</sup> )               | NR                                                                                                  | KOA 1.57 (.4,6.9)                                |

## Whittaker et al., Risk factors for knee osteoarthritis after knee trauma

**Bold (statistically significant).** ACL (Anterior cruciate ligament tear, no concomitant injury), ACL+ (ACL tear+concomitant injury), ACL? (ACL tear, concomitant injury unknown), ACLRc (ACL tear reconstruction), ACLRp (ACL tear repair), ACLnoSx (ACL tear no Sx), AKP (anterior knee pain), BMI (Body Mass Index), CI (95% confidence interval), COMP (Cartilage Oligomeric Matrix Protein), ICRS (International Cartilage Repair Society Cartilage Rating), IKDC (International Knee Documentation Committee OA scoring system), JSN (joint space narrowing), KL (Kellgren-Lawrence OA grade), KOA (knee OA inclusive of all compartments), KOS-ADL (Knee Outcome Survey Activities of Daily Living subscale), LET (Lateral Extraarticular Tenodesis), LSI (lower limb symmetry index), m (meter), MF (Microfracture), MOAKS (MRI OA knee score), mo (months), mm (millimeters), MMP-3 (Matrix metalloproteinase-3), mOARSI (modified Osteoarthritis Research Society International Atlas score), N (no), NR (not reported), NS (author reported not statistically significant), OA (osteoarthritis), OAT (Osteochondral autologous transplantation), PFJ (patellofemoral joint), PT (patellar tendon graft), ROM (range of motion), RR (risk ratio), RTS (return to sport), ST (semitendinosus graft), Sx (surgery), TF (tibiofemoral joint), TIMP-1 (), UC (unable to calculate), Y (yes), yr (years).

<sup>1</sup>Recalculated (IKDC OA = Grade B, C or D; KL OA =  $\geq 2$ ; Ahlback OA =  $\geq 1$ , PFJ OA = Grade  $\geq 1$  osteophyte, <sup>2</sup>Reference group, <sup>3</sup>Multivariable analyses, <sup>4</sup>Medial compartment assessed with medial meniscectomy only, and lateral compartment assessed with lateral meniscectomy only, <sup>5</sup>Odds ratio (95%CI) not provided, OA (95%CI) does not account for matching.

7. Meta-analysis Forest Plots

Male Sex

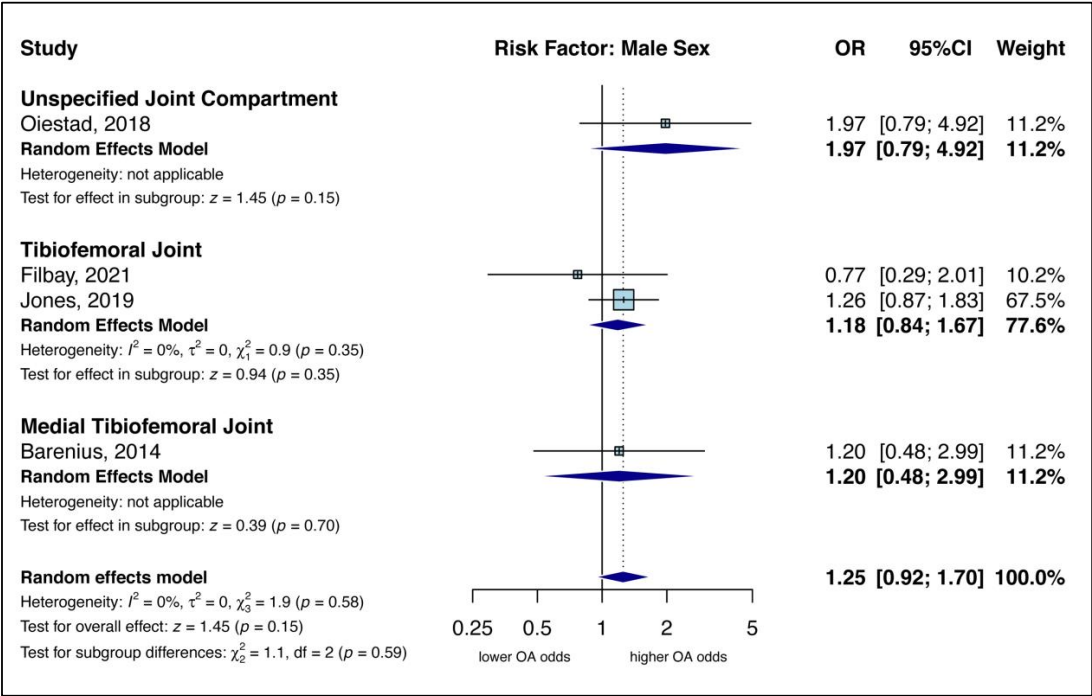

Figure 1: Odds (OR; 95% CI) of structural knee osteoarthritis (OA) by sex at Anterior Cruciate Ligament (ACL) tear, stratified by joint compartment. *There is very low-quality evidence that male sex may increase the odds of OA after an ACL tear 1.25 times (not statistically significant).*



Whittaker et al., Risk factors for knee osteoarthritis after knee trauma

## Rehabilitation for Anterior Cruciate Ligament Tear

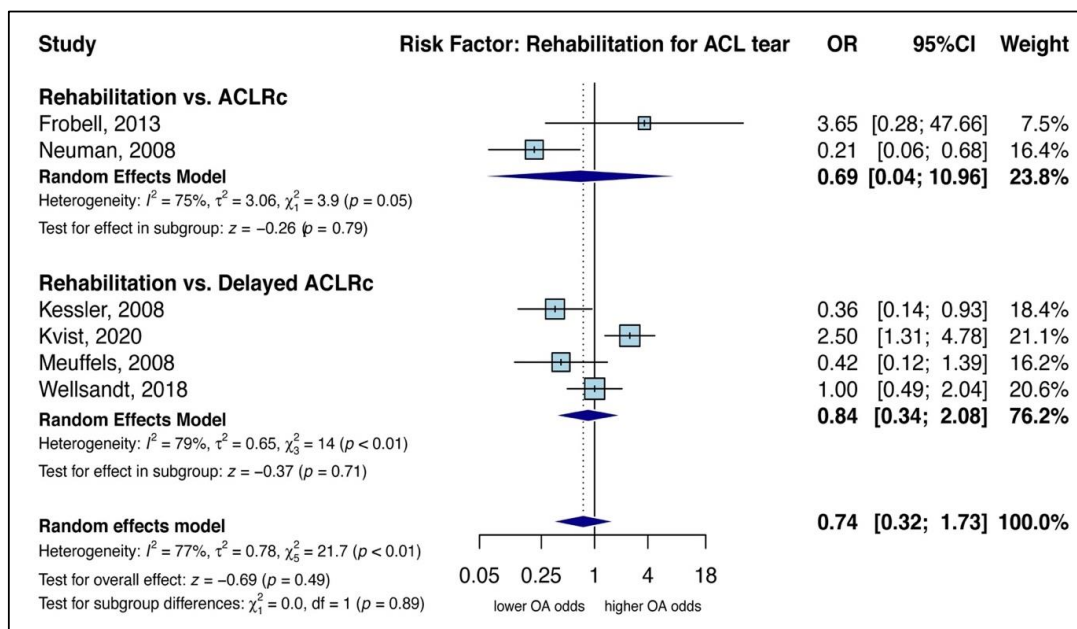

Figure 2: Odds (OR; 95% CI) of structural knee OA for management of an ACL tear with rehabilitation stratified by comparison condition (i.e., rehabilitation or delayed ACL reconstruction; ACLRc). Frobell et al 2013, Kvist 2020 and Neuman 2008 assessed tibiofemoral and patellofemoral OA with the tibiofemoral estimates included in the meta-analyses, Meuffels et al 2008 assessed tibiofemoral OA (based on radiographic views reported), Wellsandt et al 2018 assessed tibiofemoral OA but only reported medial tibiofemoral compartment OA estimates, while Kessler et al 2008 did not specify joint compartment. *There is very low-quality evidence of no difference in the odds of OA between ACL tear management with rehabilitation vs ACLRc or delayed ACLRc.*

Whittaker et al., Risk factors for knee osteoarthritis after knee trauma

**Anterior Cruciate Ligament Reconstruction for Anterior Cruciate Ligament Tear**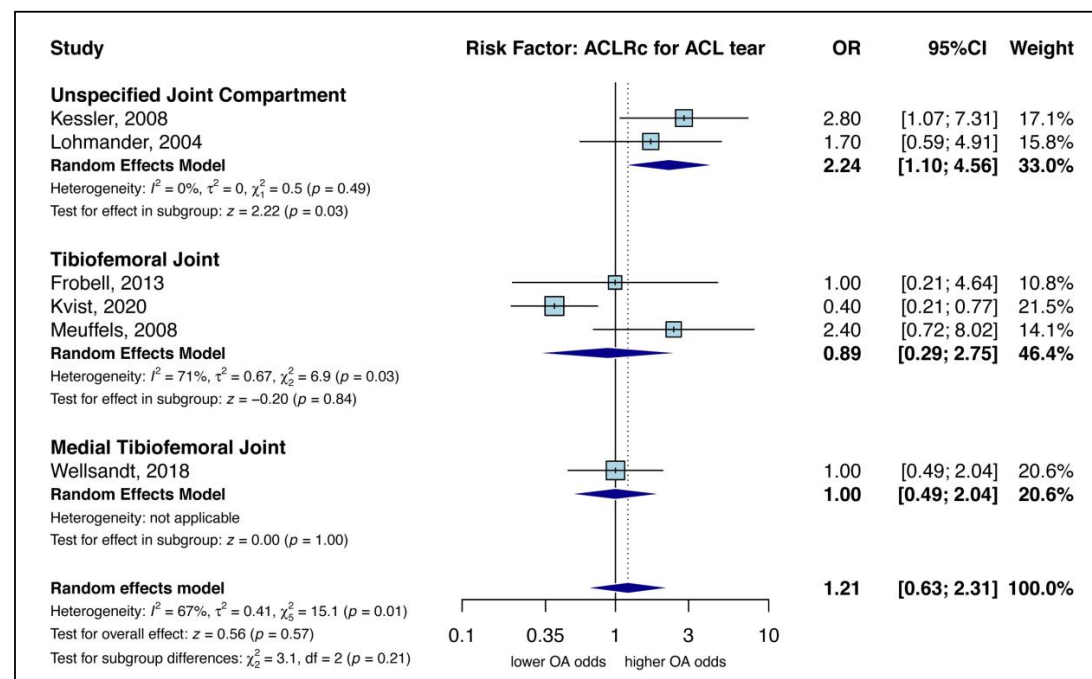

Figure 3: Odds (OR; 95% CI) of structural knee OA for management of an ACL tear with an ACLRc stratified by joint compartment. *There is very low-quality evidence of no difference in odds of structural knee OA between ACL tear management with ACLRc or non-operative management.*

Whittaker et al., Risk factors for knee osteoarthritis after knee trauma

**Age at Anterior Cruciate Ligament Reconstruction**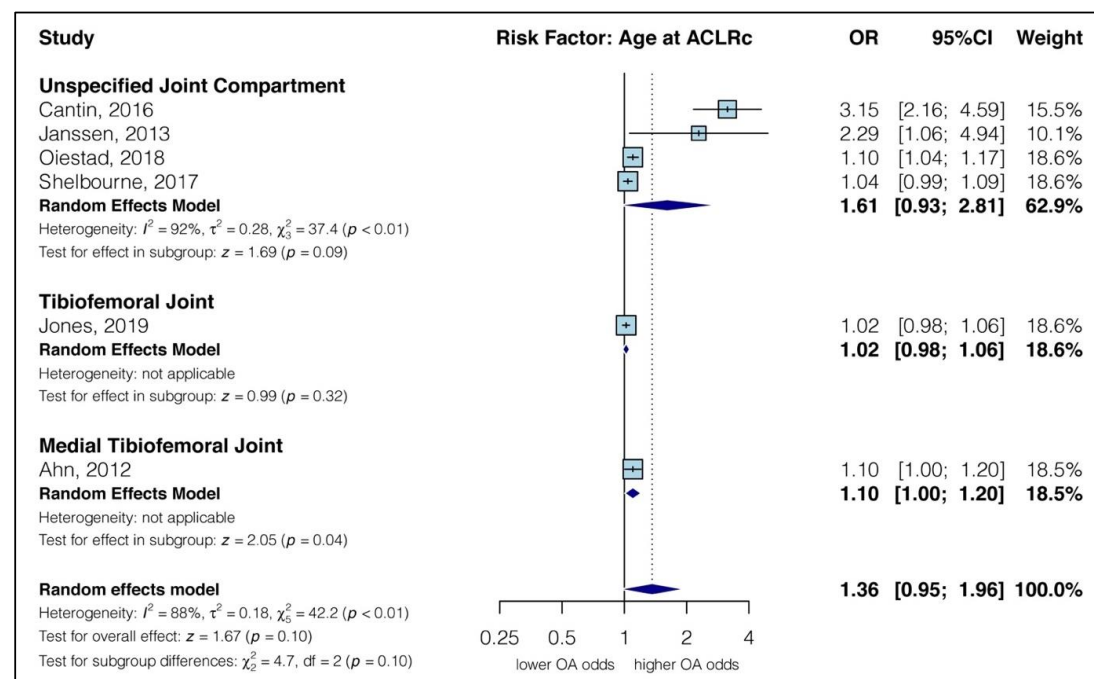

Figure 4: Odds (OR; 95%CI) of structural knee OA for every one-year increase in age at ACLRc, stratified by joint compartment. *There is very-low quality evidence that the odds of structural knee OA may increase 1.36 times for every one-year increase in age at ACLRc (not statistically significant).*

Whittaker et al., Risk factors for knee osteoarthritis after knee trauma

Body Mass Index at Anterior Cruciate Ligament Reconstruction

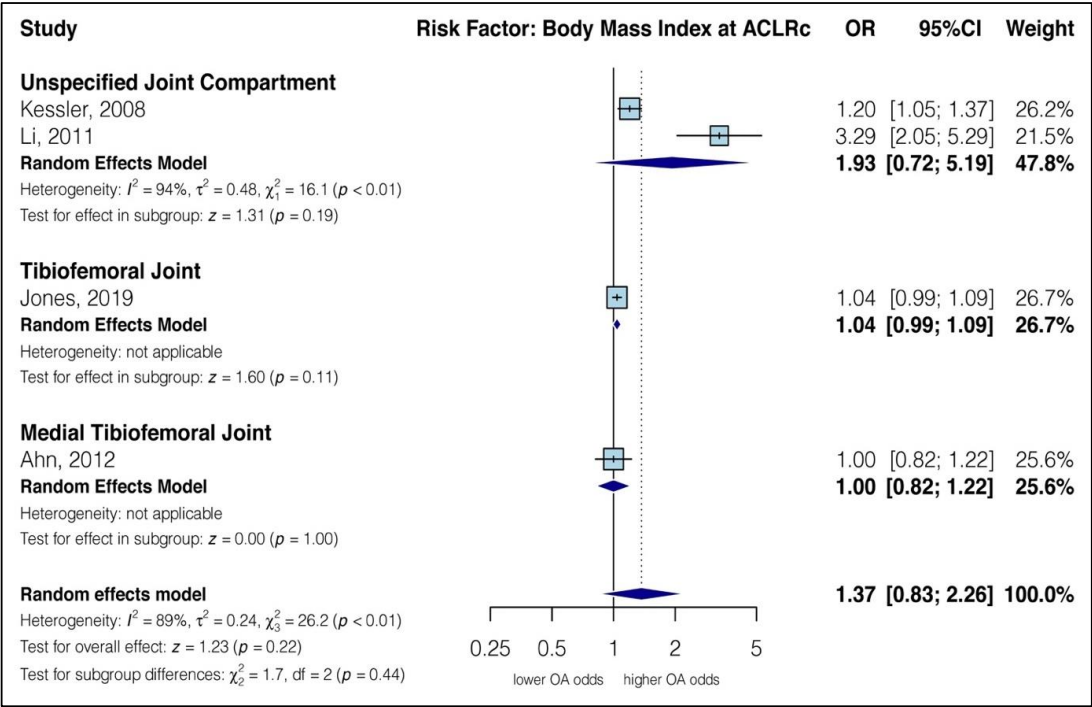

Figure 5: Odds (OR; 95% CI) of structural knee OA for every one kg/m<sup>2</sup> increase in body mass index (BMI) at ACLRc, stratified by joint compartment. *There is very low-quality evidence of no difference in odds of structural knee OA with a one kg/m<sup>2</sup> change in BMI at ACLRc.*

## Whittaker et al., Risk factors for knee osteoarthritis after knee trauma

## Patellar Tendon Autograft

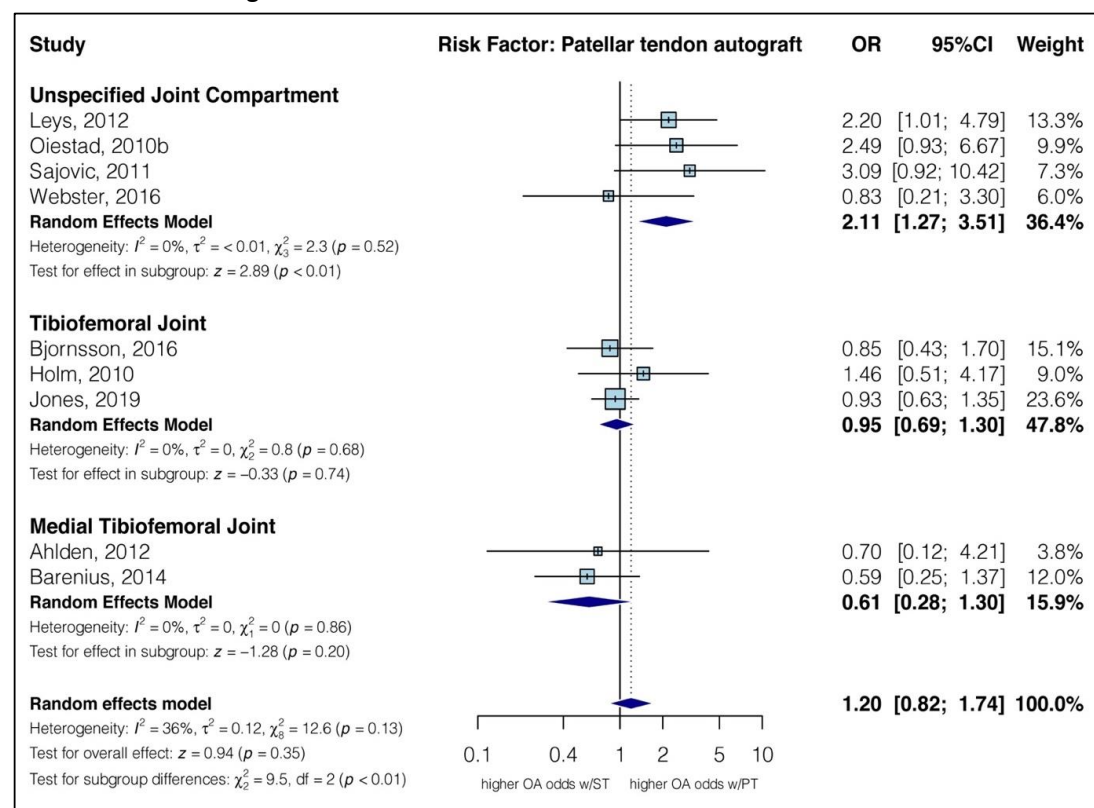

Figure 6: Odds (OR; 95% CI) of structural knee OA for patellar tendon autograft for ACLRc, stratified by joint compartment. *There is very low-quality evidence of no difference in odds of structural knee OA between a patellar tendon autograft and a semitendinosus tendon autograft.*

Anterior Cruciate Ligament Reconstruction with Augmentation

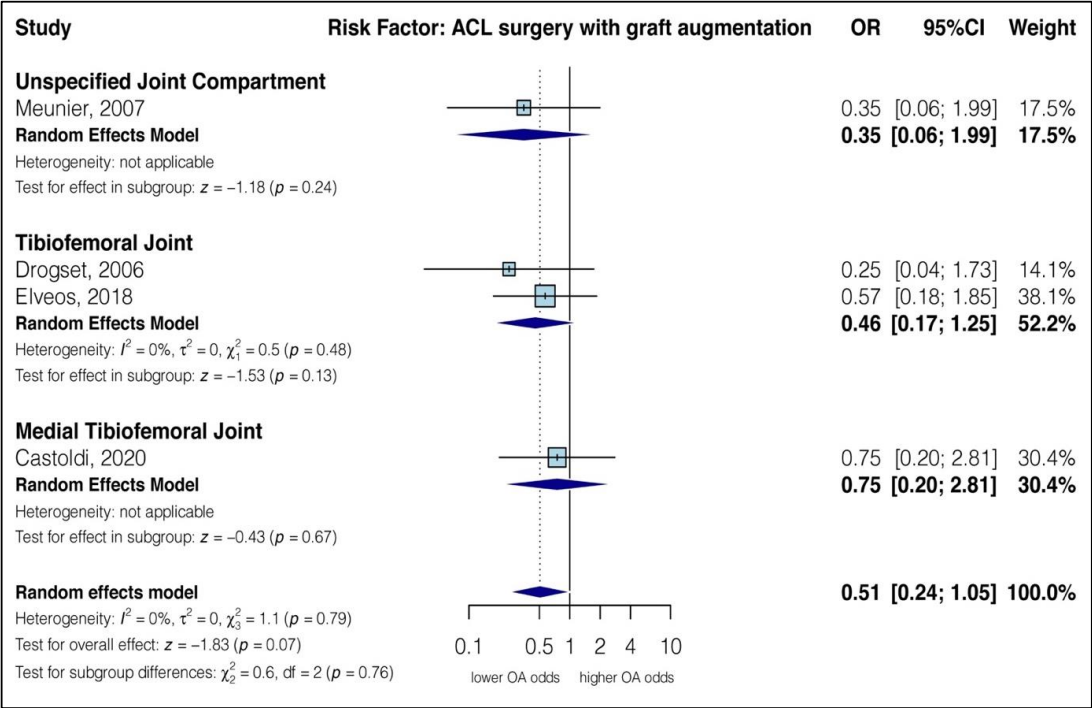

Figure 7: Odds (OR; 95% CI) of structural knee OA for ACLRc or ACL Repair with ACL graft augmentation, stratified by joint compartment. *There is very low-quality evidence that ACLRc (Castoldi et al 2020, Drogset et al 2006, Elveos et al 2018) or ACL Repair (Meunier et al 2007) with graft augmentation may decrease the odds of structural knee OA 0.51 times compared to ACL surgery with no augmentation (not statistically significant).*

Whittaker et al., Risk factors for knee osteoarthritis after knee trauma

**Cartilage Injury at Anterior Cruciate Ligament Reconstruction**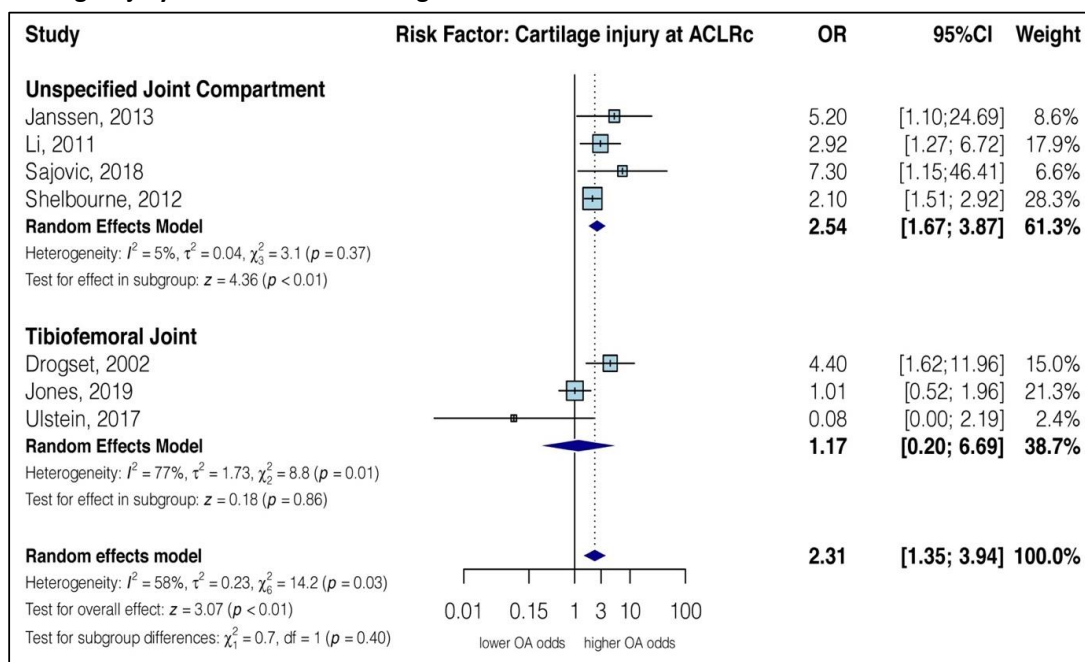

Figure 8: Odds (OR; 95% CI) of structural knee OA for cartilage injury at the time of ACLRc, stratified by joint compartment. *There is very low-quality evidence that cartilage injury at ACLRc increases the odds of structural knee OA 2.31 times compared to no cartilage injury (Drogset et al 2002, Sajovic et al 2018, Shelbourne et al 2012, Ulstein et al 2017) or less severe cartilage injury [Janssen et al 2013 (International Cartilage Repair Society Grade 3-4 vs 0-2), Jones et al 2019 (Modified Outerbridge classification Grade 2-4 vs. Grade 1), Li et al 2011 (unspecified classification system Grade 2-4 vs. grade 0-1)].*



Whittaker et al., Risk factors for knee osteoarthritis after knee trauma

**Anterior Cruciate Ligament Reconstruction with Partial Meniscectomy**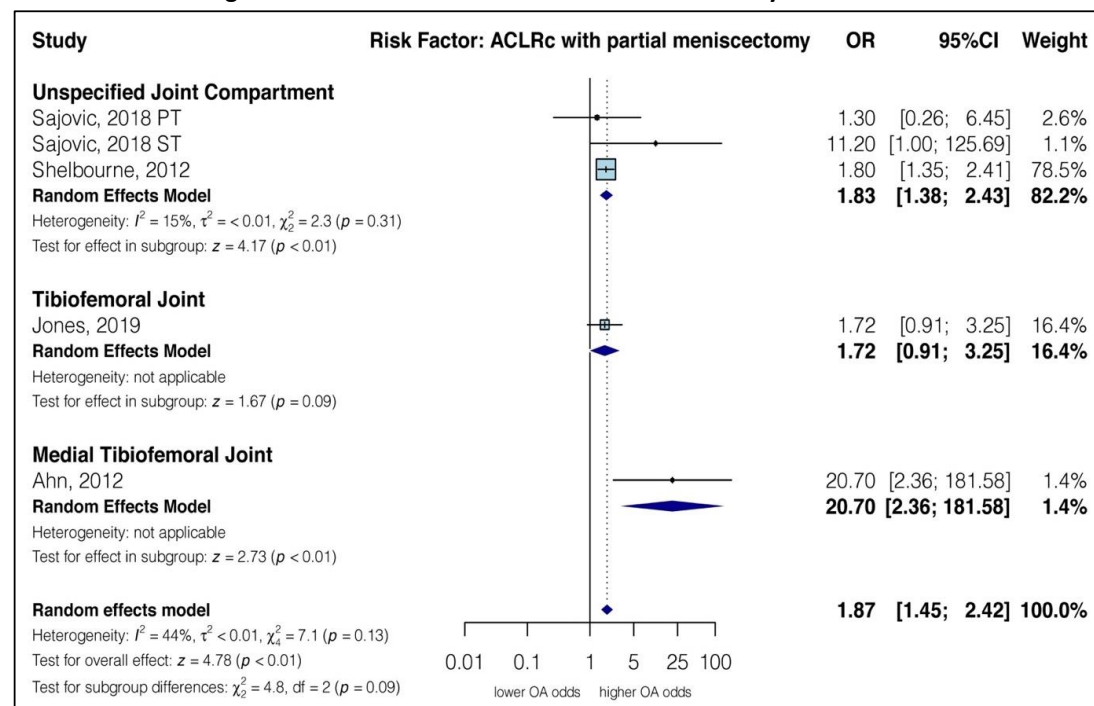

Figure 9: Odds (OR; 95% CI) of structural knee OA for ACLRc with concomitant partial meniscectomy, stratified by joint compartment. *There is very low-quality evidence that ACLRc with a concomitant partial meniscectomy increases the odds of structural knee OA 1.87 times compared to ACLRc with no concomitant partial meniscectomy.*

Anterior Cruciate Ligament Reconstruction with Total Medial Meniscectomy

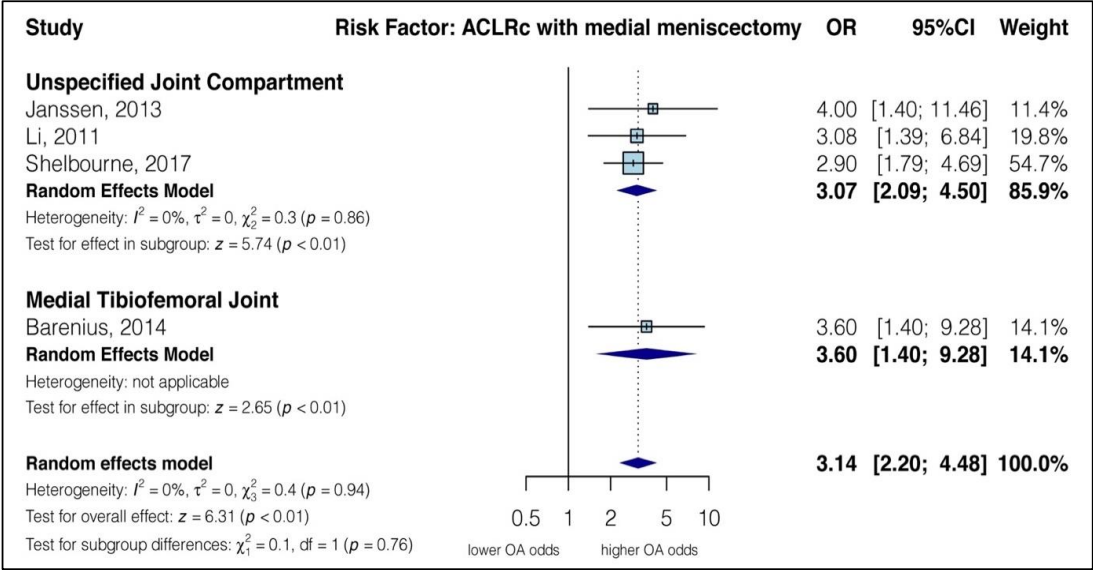

Figure 10: Odds (OR; 95% CI) of structural knee OA for ACLRc with concomitant total medial meniscectomy, stratified by joint compartment. *There is very low-quality evidence that ACLRc with a concomitant total medial meniscectomy increases the odds of structural knee OA 3.14 times compared to ACLRc without a concomitant total medial meniscectomy.*
